# Supplementary material
Source: MDPI journal article supplement (https://www.mdpi.com/search?q=molbank-2023-M1563)
Supplement: s002 [file molbank-2023-M1563-s002-mod.mol]

exp_809_new.mol
  ChemDraw12292218032D

 31 35  0  0  0  0  0  0  0  0999 V2000
   -1.9844   -2.2918    0.0000 Na  0  0  0  0  0  0  0  0  0  0  0  0
   -1.2315   -0.3178    0.0000 O   0  0  0  0  0  0  0  0  0  0  0  0
    2.0173    1.9195    0.0000 O   0  0  0  0  0  0  0  0  0  0  0  0
   -3.4949   -0.3749    0.0000 O   0  0  0  0  0  0  0  0  0  0  0  0
   -2.8342   -0.4583    0.0000 N   0  0  0  0  0  0  0  0  0  0  0  0
   -0.4182   -2.3400    0.0000 O   0  0  0  0  0  0  0  0  0  0  0  0
   -0.2090   -2.3256    0.0000 H   0  0  0  0  0  0  0  0  0  0  0  0
    0.1028   -2.4149    0.0000 H   0  0  0  0  0  0  0  0  0  0  0  0
   -0.5257    0.8504    0.0000 N   0  0  0  0  0  0  0  0  0  0  0  0
   -2.9593   -1.0126    0.0000 O   0  0  0  0  0  0  0  0  0  0  0  0
   -1.1208    1.3682    0.0000 N   0  0  0  0  0  0  0  0  0  0  0  0
    0.3366    2.0098    0.0000 N   0  0  0  0  0  0  0  0  0  0  0  0
    0.2367    1.0656    0.0000 N   0  0  0  0  0  0  0  0  0  0  0  0
   -1.2665    0.1548    0.0000 C   0  0  0  0  0  0  0  0  0  0  0  0
    1.6045    2.2339    0.0000 C   0  0  0  0  0  0  0  0  0  0  0  0
   -0.4514    1.4203    0.0000 C   0  0  0  0  0  0  0  0  0  0  0  0
    0.7264    1.7642    0.0000 C   0  0  0  0  0  0  0  0  0  0  0  0
   -1.8450    0.7433    0.0000 C   0  0  0  0  0  0  0  0  0  0  0  0
   -1.9700    0.1459    0.0000 C   0  0  0  0  0  0  0  0  0  0  0  0
    2.8522    2.5011    0.0000 C   0  0  0  0  0  0  0  0  0  0  0  0
    2.1640    2.9806    0.0000 C   0  0  0  0  0  0  0  0  0  0  0  0
    2.9764    3.1241    0.0000 C   0  0  0  0  0  0  0  0  0  0  0  0
    3.4949    3.5741    0.0000 H   0  0  0  0  0  0  0  0  0  0  0  0
    2.0402    3.3638    0.0000 H   0  0  0  0  0  0  0  0  0  0  0  0
   -2.2716    0.6519    0.0000 H   0  0  0  0  0  0  0  0  0  0  0  0
    3.1114    2.2339    0.0000 H   0  0  0  0  0  0  0  0  0  0  0  0
   -1.4606    2.6210    0.0000 Na  0  0  0  0  0  0  0  0  0  0  0  0
    0.2660   -0.2167    0.0000 Na  0  0  0  0  0  0  0  0  0  0  0  0
   -3.4819   -2.1907    0.0000 O   0  0  0  0  0  0  0  0  0  0  0  0
   -2.3243   -3.5446    0.0000 N   0  0  0  0  0  0  0  0  0  0  0  0
   -2.0137   -3.5741    0.0000 N   0  0  0  0  0  0  0  0  0  0  0  0
  1  2  1  0      
  1  6  1  0      
  1 10  1  0      
  1 29  1  0      
  1 30  1  0      
  1 31  1  0      
  2 14  1  0      
  2 28  1  0      
  3 15  1  0      
  3 20  1  0      
  4  5  1  0      
  5 10  1  0      
  5 19  1  0      
  6  7  1  0      
  6  8  1  0      
  9 13  1  0      
  9 14  1  0      
  9 16  1  0      
 11 16  1  0      
 11 18  1  0      
 11 27  1  0      
 12 16  1  0      
 12 17  1  0      
 13 17  1  0      
 13 28  1  0      
 14 19  1  0      
 15 17  1  0      
 15 21  1  0      
 18 19  1  0      
 18 25  1  0      
 20 22  1  0      
 20 26  1  0      
 21 22  1  0      
 21 24  1  0      
 22 23  1  0      
M  END
