# Supplementary material
Source: MDPI journal article supplement (https://www.mdpi.com/search?q=molbank-2023-M1563)
Supplement: s003 [file molbank-2023-M1563-s003.cif]

data_exp_809
_audit_creation_date               2020-07-16
_audit_creation_method
;
Olex2 1.3
(compiled 2020.06.28 svn.raecde09e for OlexSys, GUI svn.r6132)
;
_shelx_SHELXL_version_number       '2018/3'
_audit_contact_author_address      ?
_audit_contact_author_email        ?
_audit_contact_author_name         ''
_audit_contact_author_phone        ?
_publ_contact_author_id_orcid      ?
_publ_section_references
;
Dolomanov, O.V., Bourhis, L.J., Gildea, R.J, Howard, J.A.K. & Puschmann, H.
 (2009), J. Appl. Cryst. 42, 339-341.

Sheldrick, G.M. (2015). Acta Cryst. A71, 3-8.

Sheldrick, G.M. (2015). Acta Cryst. C71, 3-8.
;
_chemical_name_common              ?
_chemical_name_systematic          ?
_chemical_formula_moiety           'C9 H6 N5 Na O5'
_chemical_formula_sum              'C9 H6 N5 Na O5'
_chemical_formula_weight           287.18
_chemical_absolute_configuration   ?
_chemical_melting_point            ?
loop_
  _atom_type_symbol
  _atom_type_description
  _atom_type_scat_dispersion_real
  _atom_type_scat_dispersion_imag
  _atom_type_scat_source
 'C' 'C' 0.0033 0.0016 'International Tables Vol C Tables 4.2.6.8 and 6.1.1.4'
 'H' 'H' 0.0000 0.0000 'International Tables Vol C Tables 4.2.6.8 and 6.1.1.4'
 'N' 'N' 0.0061 0.0033 'International Tables Vol C Tables 4.2.6.8 and 6.1.1.4'
 'Na' 'Na' 0.0362 0.0249 'International Tables Vol C Tables 4.2.6.8 and 6.1.1.4'
 'O' 'O' 0.0106 0.0060 'International Tables Vol C Tables 4.2.6.8 and 6.1.1.4'

_shelx_space_group_comment
;
The symmetry employed for this shelxl refinement is uniquely defined
by the following loop, which should always be used as a source of
symmetry information in preference to the above space-group names.
They are only intended as comments.
;
_space_group_crystal_system        'orthorhombic'
_space_group_IT_number             19
_space_group_name_H-M_alt          'P 21 21 21'
_space_group_name_Hall             'P 2ac 2ab'
loop_
  _space_group_symop_operation_xyz
 'x, y, z'
 '-x+1/2, -y, z+1/2'
 '-x, y+1/2, -z+1/2'
 'x+1/2, -y+1/2, -z'

_cell_length_a                     6.0608(9)
_cell_length_b                     13.231(2)
_cell_length_c                     13.608(2)
_cell_angle_alpha                  90
_cell_angle_beta                   90
_cell_angle_gamma                  90
_cell_volume                       1091.3(3)
_cell_formula_units_Z              4
_cell_measurement_reflns_used      617
_cell_measurement_temperature      295(2)
_cell_measurement_theta_max        22.3410
_cell_measurement_theta_min        3.6950
_shelx_estimated_absorpt_T_max     0.984
_shelx_estimated_absorpt_T_min     0.926
_exptl_absorpt_coefficient_mu      0.177
_exptl_absorpt_correction_T_max    1.00000
_exptl_absorpt_correction_T_min    0.43782
_exptl_absorpt_correction_type     multi-scan
_exptl_absorpt_process_details
;
CrysAlisPro 1.171.39.38a (Rigaku Oxford Diffraction, 2017)
Empirical absorption correction using spherical harmonics,
 implemented in SCALE3 ABSPACK scaling algorithm.
;
_exptl_absorpt_special_details     ?
_exptl_crystal_colour              colourless
_exptl_crystal_colour_primary      colourless
_exptl_crystal_density_diffrn      1.748
_exptl_crystal_density_meas        ?
_exptl_crystal_density_method      ?
_exptl_crystal_description         needle
_exptl_crystal_F_000               584
_exptl_crystal_size_max            0.44
_exptl_crystal_size_mid            0.31
_exptl_crystal_size_min            0.09
_exptl_transmission_factor_max     ?
_exptl_transmission_factor_min     ?
_diffrn_reflns_av_R_equivalents    0.0766
_diffrn_reflns_av_unetI/netI       0.1364
_diffrn_reflns_Laue_measured_fraction_full  0.990
_diffrn_reflns_Laue_measured_fraction_max  0.990
_diffrn_reflns_limit_h_max         6
_diffrn_reflns_limit_h_min         -7
_diffrn_reflns_limit_k_max         16
_diffrn_reflns_limit_k_min         -10
_diffrn_reflns_limit_l_max         17
_diffrn_reflns_limit_l_min         -10
_diffrn_reflns_number              3615
_diffrn_reflns_point_group_measured_fraction_full  0.989
_diffrn_reflns_point_group_measured_fraction_max  0.988
_diffrn_reflns_theta_full          25.242
_diffrn_reflns_theta_max           27.085
_diffrn_reflns_theta_min           3.680
_diffrn_ambient_temperature        295(2)
_diffrn_detector                   'CCD plate'
_diffrn_detector_area_resol_mean   16.5253
_diffrn_detector_type              Sapphire3
_diffrn_measured_fraction_theta_full  0.990
_diffrn_measured_fraction_theta_max  0.990
_diffrn_measurement_details
;
List of Runs (angles in degrees, time in seconds):

  # Type    Start    End  Width  t~exp~   \w     \q     \k     \f   Frames
--------------------------------------------------------------------------
  1  \w     -3.00  56.00   1.00  100.00    --   22.21  71.00 148.00   59
  2  \w     -9.00  51.00   1.00  100.00    --   22.21  79.00  27.00   60
  3  \w    -14.00  40.00   1.00  100.00    --  -23.92  71.00 -86.00   54
;
_diffrn_measurement_device         'four-circle diffractometer'
_diffrn_measurement_device_type    'Xcalibur, Sapphire3'
_diffrn_measurement_method         '\w scans'
_diffrn_orient_matrix_type        
 'CrysAlisPro convention (1999,Acta A55,543-557)'
_diffrn_orient_matrix_UB_11        0.0108751000
_diffrn_orient_matrix_UB_12        0.0376480000
_diffrn_orient_matrix_UB_13        -0.0368217000
_diffrn_orient_matrix_UB_21        0.0928216000
_diffrn_orient_matrix_UB_22        -0.0257703000
_diffrn_orient_matrix_UB_23        -0.0195288000
_diffrn_orient_matrix_UB_31        -0.0704686000
_diffrn_orient_matrix_UB_32        -0.0281042000
_diffrn_orient_matrix_UB_33        -0.0313245000
_diffrn_radiation_monochromator    graphite
_diffrn_radiation_probe            x-ray
_diffrn_radiation_type             'Mo K\a'
_diffrn_radiation_wavelength       0.71073
_diffrn_source                     'fine-focus sealed X-ray tube'
_diffrn_source_type                'Enhance (Mo) X-ray Source'
_reflns_Friedel_coverage           0.700
_reflns_Friedel_fraction_full      0.989
_reflns_Friedel_fraction_max       0.984
_reflns_number_gt                  1393
_reflns_number_total               2378
_reflns_odcompleteness_completeness  88.40
_reflns_odcompleteness_iscentric   1
_reflns_odcompleteness_theta       28.22
_reflns_special_details
;
 Reflections were merged by SHELXL according to the crystal
 class for the calculation of statistics and refinement.
 
 _reflns_Friedel_fraction is defined as the number of unique
 Friedel pairs measured divided by the number that would be
 possible theoretically, ignoring centric projections and
 systematic absences.
;
_reflns_threshold_expression       'I > 2\s(I)'
_computing_cell_refinement         'CrysAlisPro 1.171.39.38a (Rigaku OD, 2017)'
_computing_data_collection         'CrysAlisPro 1.171.39.38a (Rigaku OD, 2017)'
_computing_data_reduction          'CrysAlisPro 1.171.39.38a (Rigaku OD, 2017)'
_computing_molecular_graphics      'Olex2 1.3 (Dolomanov et al., 2009)'
_computing_publication_material    'Olex2 1.3 (Dolomanov et al., 2009)'
_computing_structure_refinement    'SHELXL 2018/3 (Sheldrick, 2015)'
_computing_structure_solution      'SHELXT 2018/2 (Sheldrick, 2018)'
_refine_diff_density_max           0.285
_refine_diff_density_min           -0.366
_refine_diff_density_rms           0.073
_refine_ls_abs_structure_details
;
 Flack x determined using 336 quotients [(I+)-(I-)]/[(I+)+(I-)]
 (Parsons, Flack and Wagner, Acta Cryst. B69 (2013) 249-259).
;
_refine_ls_abs_structure_Flack     -0.1(9)
_refine_ls_extinction_coef         .
_refine_ls_extinction_method       none
_refine_ls_goodness_of_fit_ref     1.015
_refine_ls_hydrogen_treatment      mixed
_refine_ls_matrix_type             full
_refine_ls_number_parameters       196
_refine_ls_number_reflns           2378
_refine_ls_number_restraints       1
_refine_ls_R_factor_all            0.1250
_refine_ls_R_factor_gt             0.0687
_refine_ls_restrained_S_all        1.015
_refine_ls_shift/su_max            0.001
_refine_ls_shift/su_mean           0.000
_refine_ls_structure_factor_coef   Fsqd
_refine_ls_weighting_details      
 'w=1/[\s^2^(Fo^2^)+(0.0523P)^2^] where P=(Fo^2^+2Fc^2^)/3'
_refine_ls_weighting_scheme        calc
_refine_ls_wR_factor_gt            0.1378
_refine_ls_wR_factor_ref           0.1840
_refine_special_details            ?
_olex2_refinement_description
;
1. Fixed Uiso
 At 1.2 times of:
  All C(H) groups
 At 1.5 times of:
  All O(H,H) groups
2. Restrained distances
 Na1-H5A \\sim Na1-H5B
 with sigma of 0.02
3.a Free rotating group:
 O5(H5A,H5B)
3.b Aromatic/amide H refined with riding coordinates:
 C12(H12)
;
_atom_sites_solution_hydrogens     mixed
_atom_sites_solution_primary       dual
_atom_sites_solution_secondary     ?
loop_
  _atom_site_label
  _atom_site_type_symbol
  _atom_site_fract_x
  _atom_site_fract_y
  _atom_site_fract_z
  _atom_site_U_iso_or_equiv
  _atom_site_adp_type
  _atom_site_occupancy
  _atom_site_site_symmetry_order
  _atom_site_calc_flag
  _atom_site_refinement_flags_posn
  _atom_site_refinement_flags_adp
  _atom_site_refinement_flags_occupancy
  _atom_site_disorder_assembly
  _atom_site_disorder_group
 Na1 Na -0.0582(5) 0.1444(2) 0.5516(2) 0.0494(8) Uani 1 1 d D . . . .
 O2 O 0.1091(7) 0.3453(4) 0.5495(3) 0.0403(12) Uani 1 1 d . . . . .
 O1 O 0.8309(8) 0.5730(4) 0.5124(4) 0.0456(14) Uani 1 1 d . . . . .
 O4 O -0.3938(9) 0.3395(4) 0.7641(4) 0.0518(15) Uani 1 1 d . . . . .
 N005 N -0.2470(10) 0.3310(4) 0.7001(4) 0.0388(14) Uani 1 1 d . . . . .
 O5 O 0.2898(10) 0.1395(5) 0.6069(4) 0.0573(16) Uani 1 1 d G . . . .
 H5A H 0.336255 0.140965 0.665810 0.086 Uiso 1 1 d DG U . . .
 H5B H 0.405546 0.131874 0.572374 0.086 Uiso 1 1 d DG U . . .
 N1 N 0.2659(9) 0.4642(4) 0.6474(4) 0.0319(13) Uani 1 1 d . . . . .
 O3 O -0.2748(10) 0.2746(4) 0.6290(4) 0.0555(15) Uani 1 1 d . . . . .
 N6 N 0.1337(10) 0.5169(5) 0.8046(4) 0.0411(15) Uani 1 1 d . . . . .
 N4 N 0.4575(10) 0.5822(4) 0.7232(4) 0.0381(14) Uani 1 1 d . . . . .
 N2 N 0.4353(10) 0.4861(4) 0.5844(4) 0.0336(13) Uani 1 1 d . . . . .
 C9 C 0.1013(11) 0.3934(5) 0.6277(5) 0.0314(15) Uani 1 1 d . . . . .
 C10 C 0.7392(13) 0.6050(5) 0.5984(5) 0.0385(16) Uani 1 1 d . . . . .
 C5 C 0.2824(12) 0.5222(5) 0.7296(5) 0.0352(16) Uani 1 1 d . . . . .
 C3 C 0.5441(12) 0.5572(5) 0.6352(5) 0.0363(16) Uani 1 1 d . . . . .
 C7 C -0.0272(12) 0.4533(6) 0.7897(5) 0.0388(17) Uani 1 1 d . . . . .
 C8 C -0.0550(12) 0.3925(5) 0.7060(5) 0.0338(15) Uani 1 1 d . . . . .
 C13 C 1.0164(13) 0.6322(7) 0.4989(6) 0.050(2) Uani 1 1 d . . . . .
 C11 C 0.8635(13) 0.6810(6) 0.6374(6) 0.0405(17) Uani 1 1 d . . . . .
 C12 C 1.0440(14) 0.6956(6) 0.5716(5) 0.050(2) Uani 1 1 d . . . . .
 H12 H 1.159204 0.741403 0.578991 0.060 Uiso 1 1 calc R U . . .
 H11 H 0.836(12) 0.720(6) 0.705(5) 0.05(2) Uiso 1 1 d . . . . .
 H7 H -0.122(13) 0.444(6) 0.838(6) 0.06(3) Uiso 1 1 d . . . . .
 H13 H 1.074(14) 0.605(7) 0.439(7) 0.07(3) Uiso 1 1 d . . . . .

loop_
  _atom_site_aniso_label
  _atom_site_aniso_U_11
  _atom_site_aniso_U_22
  _atom_site_aniso_U_33
  _atom_site_aniso_U_23
  _atom_site_aniso_U_13
  _atom_site_aniso_U_12
 Na1 0.0498(16) 0.0530(19) 0.0454(17) -0.0110(14) -0.0095(14) 0.0084(17)
 O2 0.039(3) 0.042(3) 0.040(3) -0.007(2) -0.001(2) -0.003(3)
 O1 0.046(3) 0.049(3) 0.042(3) -0.010(2) 0.010(3) -0.011(3)
 O4 0.048(3) 0.057(4) 0.051(3) -0.002(3) 0.015(3) -0.009(3)
 N005 0.044(3) 0.031(3) 0.041(3) 0.005(3) -0.002(3) -0.002(3)
 O5 0.047(3) 0.072(4) 0.053(3) 0.006(3) -0.001(3) -0.006(3)
 N1 0.034(3) 0.027(3) 0.035(3) -0.006(2) -0.005(3) 0.000(3)
 O3 0.055(4) 0.053(3) 0.058(3) -0.021(3) 0.000(3) -0.012(3)
 N6 0.046(3) 0.041(4) 0.036(3) -0.005(3) 0.000(3) -0.007(3)
 N4 0.043(3) 0.036(3) 0.035(3) -0.007(2) -0.003(3) -0.007(3)
 N2 0.030(3) 0.035(3) 0.036(3) 0.002(2) 0.002(3) -0.005(3)
 C9 0.038(3) 0.023(3) 0.033(3) 0.001(3) 0.003(3) 0.004(3)
 C10 0.046(4) 0.028(4) 0.041(4) 0.005(3) 0.000(4) 0.002(4)
 C5 0.046(4) 0.032(4) 0.027(3) -0.001(3) 0.001(3) 0.004(3)
 C3 0.043(4) 0.030(4) 0.036(4) -0.002(3) -0.009(3) -0.002(3)
 C7 0.040(4) 0.035(4) 0.041(4) 0.000(3) 0.010(4) 0.003(3)
 C8 0.037(3) 0.027(3) 0.037(4) -0.003(3) 0.004(3) -0.005(3)
 C13 0.048(5) 0.055(6) 0.047(5) 0.000(4) 0.001(4) -0.004(4)
 C11 0.044(4) 0.037(4) 0.041(4) -0.005(3) 0.002(4) -0.013(3)
 C12 0.044(4) 0.055(5) 0.051(5) 0.008(4) -0.007(4) -0.010(4)

_geom_special_details
;
 All esds (except the esd in the dihedral angle between two l.s. planes)
 are estimated using the full covariance matrix.  The cell esds are taken
 into account individually in the estimation of esds in distances, angles
 and torsion angles; correlations between esds in cell parameters are only
 used when they are defined by crystal symmetry.  An approximate (isotropic)
 treatment of cell esds is used for estimating esds involving l.s. planes.
;
loop_
  _geom_bond_atom_site_label_1
  _geom_bond_atom_site_label_2
  _geom_bond_distance
  _geom_bond_site_symmetry_2
  _geom_bond_publ_flag
 Na1 O2 2.846(6) . ?
 Na1 O2 2.446(5) 4_456 ?
 Na1 O5 2.240(6) . ?
 Na1 O3 2.409(6) . ?
 Na1 N6 2.623(7) 3_546 ?
 Na1 N2 2.531(6) 4_456 ?
 O2 C9 1.240(8) . ?
 O1 C10 1.363(8) . ?
 O1 C13 1.383(9) . ?
 O4 N005 1.250(7) . ?
 N005 O3 1.234(7) . ?
 N005 C8 1.423(9) . ?
 O5 H5A 0.8504 . ?
 O5 H5B 0.8499 . ?
 N1 N2 1.369(8) . ?
 N1 C9 1.394(8) . ?
 N1 C5 1.360(8) . ?
 N6 C5 1.363(8) . ?
 N6 C7 1.304(9) . ?
 N4 C5 1.328(9) . ?
 N4 C3 1.350(9) . ?
 N2 C3 1.341(8) . ?
 C9 C8 1.426(10) . ?
 C10 C3 1.431(10) . ?
 C10 C11 1.364(9) . ?
 C7 C8 1.403(9) . ?
 C7 H7 0.88(8) . ?
 C13 C12 1.307(12) . ?
 C13 H13 0.96(9) . ?
 C11 C12 1.427(11) . ?
 C11 H11 1.07(7) . ?
 C12 H12 0.9300 . ?

loop_
  _geom_angle_atom_site_label_1
  _geom_angle_atom_site_label_2
  _geom_angle_atom_site_label_3
  _geom_angle
  _geom_angle_site_symmetry_1
  _geom_angle_site_symmetry_3
  _geom_angle_publ_flag
 O2 Na1 O2 103.64(15) 4_456 . ?
 O2 Na1 N6 108.2(2) 4_456 3_546 ?
 O2 Na1 N2 67.26(18) 4_456 4_456 ?
 O5 Na1 O2 165.2(2) . 4_456 ?
 O5 Na1 O2 72.2(2) . . ?
 O5 Na1 O3 112.8(2) . . ?
 O5 Na1 N6 84.0(2) . 3_546 ?
 O5 Na1 N2 103.9(2) . 4_456 ?
 O3 Na1 O2 61.97(18) . . ?
 O3 Na1 O2 75.9(2) . 4_456 ?
 O3 Na1 N6 92.2(2) . 3_546 ?
 O3 Na1 N2 143.0(2) . 4_456 ?
 N6 Na1 O2 132.1(2) 3_546 . ?
 N2 Na1 O2 129.4(2) 4_456 . ?
 N2 Na1 N6 96.0(2) 4_456 3_546 ?
 Na1 O2 Na1 110.59(19) 4_556 . ?
 C9 O2 Na1 119.0(4) . 4_556 ?
 C9 O2 Na1 117.2(4) . . ?
 C10 O1 C13 105.6(6) . . ?
 O4 N005 C8 119.4(5) . . ?
 O3 N005 O4 120.3(7) . . ?
 O3 N005 C8 120.1(6) . . ?
 Na1 O5 H5A 128.9 . . ?
 Na1 O5 H5B 126.5 . . ?
 H5A O5 H5B 104.5 . . ?
 N2 N1 C9 123.9(5) . . ?
 C5 N1 N2 109.9(5) . . ?
 C5 N1 C9 126.2(6) . . ?
 N005 O3 Na1 134.5(5) . . ?
 C5 N6 Na1 129.8(5) . 3_556 ?
 C7 N6 Na1 113.6(5) . 3_556 ?
 C7 N6 C5 114.3(6) . . ?
 C5 N4 C3 102.9(6) . . ?
 N1 N2 Na1 109.0(4) . 4_556 ?
 C3 N2 Na1 147.9(5) . 4_556 ?
 C3 N2 N1 101.3(5) . . ?
 O2 C9 N1 118.9(6) . . ?
 O2 C9 C8 131.4(6) . . ?
 N1 C9 C8 109.7(6) . . ?
 O1 C10 C3 120.0(6) . . ?
 O1 C10 C11 109.8(7) . . ?
 C11 C10 C3 130.2(7) . . ?
 N1 C5 N6 122.5(6) . . ?
 N4 C5 N1 110.0(6) . . ?
 N4 C5 N6 127.5(6) . . ?
 N4 C3 C10 121.6(6) . . ?
 N2 C3 N4 115.9(7) . . ?
 N2 C3 C10 122.5(7) . . ?
 N6 C7 C8 125.8(7) . . ?
 N6 C7 H7 117(5) . . ?
 C8 C7 H7 117(5) . . ?
 N005 C8 C9 120.4(6) . . ?
 C7 C8 N005 118.1(6) . . ?
 C7 C8 C9 121.4(7) . . ?
 O1 C13 H13 101(6) . . ?
 C12 C13 O1 111.6(7) . . ?
 C12 C13 H13 147(6) . . ?
 C10 C11 C12 106.2(7) . . ?
 C10 C11 H11 127(4) . . ?
 C12 C11 H11 127(4) . . ?
 C13 C12 C11 106.8(7) . . ?
 C13 C12 H12 126.6 . . ?
 C11 C12 H12 126.6 . . ?

loop_
  _geom_torsion_atom_site_label_1
  _geom_torsion_atom_site_label_2
  _geom_torsion_atom_site_label_3
  _geom_torsion_atom_site_label_4
  _geom_torsion
  _geom_torsion_site_symmetry_1
  _geom_torsion_site_symmetry_2
  _geom_torsion_site_symmetry_3
  _geom_torsion_site_symmetry_4
  _geom_torsion_publ_flag
 Na1 O2 C9 N1 10.3(8) 4_556 . . . ?
 Na1 O2 C9 N1 147.8(4) . . . . ?
 Na1 O2 C9 C8 -171.2(6) 4_556 . . . ?
 Na1 O2 C9 C8 -33.7(9) . . . . ?
 Na1 N6 C5 N1 -162.9(5) 3_556 . . . ?
 Na1 N6 C5 N4 16.3(11) 3_556 . . . ?
 Na1 N6 C7 C8 165.0(6) 3_556 . . . ?
 Na1 N2 C3 N4 -161.2(6) 4_556 . . . ?
 Na1 N2 C3 C10 19.4(13) 4_556 . . . ?
 O2 C9 C8 N005 -2.6(12) . . . . ?
 O2 C9 C8 C7 178.8(7) . . . . ?
 O1 C10 C3 N4 175.4(6) . . . . ?
 O1 C10 C3 N2 -5.2(10) . . . . ?
 O1 C10 C11 C12 -0.7(8) . . . . ?
 O1 C13 C12 C11 -1.7(10) . . . . ?
 O4 N005 O3 Na1 -130.9(7) . . . . ?
 O4 N005 C8 C9 -172.1(6) . . . . ?
 O4 N005 C8 C7 6.6(10) . . . . ?
 N1 N2 C3 N4 -0.5(8) . . . . ?
 N1 N2 C3 C10 -180.0(6) . . . . ?
 N1 C9 C8 N005 176.0(6) . . . . ?
 N1 C9 C8 C7 -2.7(9) . . . . ?
 O3 N005 C8 C9 3.1(10) . . . . ?
 O3 N005 C8 C7 -178.2(7) . . . . ?
 N6 C7 C8 N005 -176.9(7) . . . . ?
 N6 C7 C8 C9 1.7(12) . . . . ?
 N2 N1 C9 O2 1.6(9) . . . . ?
 N2 N1 C9 C8 -177.2(6) . . . . ?
 N2 N1 C5 N6 179.4(6) . . . . ?
 N2 N1 C5 N4 0.1(8) . . . . ?
 C9 N1 N2 Na1 -11.3(7) . . . 4_556 ?
 C9 N1 N2 C3 179.4(6) . . . . ?
 C9 N1 C5 N6 0.2(10) . . . . ?
 C9 N1 C5 N4 -179.1(6) . . . . ?
 C10 O1 C13 C12 1.3(9) . . . . ?
 C10 C11 C12 C13 1.5(9) . . . . ?
 C5 N1 N2 Na1 169.5(4) . . . 4_556 ?
 C5 N1 N2 C3 0.3(7) . . . . ?
 C5 N1 C9 O2 -179.4(6) . . . . ?
 C5 N1 C9 C8 1.8(9) . . . . ?
 C5 N6 C7 C8 0.5(11) . . . . ?
 C5 N4 C3 N2 0.6(8) . . . . ?
 C5 N4 C3 C10 180.0(6) . . . . ?
 C3 N4 C5 N1 -0.4(7) . . . . ?
 C3 N4 C5 N6 -179.6(7) . . . . ?
 C3 C10 C11 C12 177.7(7) . . . . ?
 C7 N6 C5 N1 -1.5(10) . . . . ?
 C7 N6 C5 N4 177.7(7) . . . . ?
 C8 N005 O3 Na1 53.9(9) . . . . ?
 C13 O1 C10 C3 -178.9(6) . . . . ?
 C13 O1 C10 C11 -0.3(8) . . . . ?
 C11 C10 C3 N4 -2.8(12) . . . . ?
 C11 C10 C3 N2 176.6(7) . . . . ?

_shelx_res_file
;
TITL exp_809_a.res in P2(1)2(1)2(1)
    exp_809.res
    created by SHELXL-2018/3 at 10:39:49 on 16-Jul-2020
REM Old TITL exp_809 in P2(1)2(1)2(1)
REM SHELXT solution in P2(1)2(1)2(1): R1 0.167, Rweak 0.040, Alpha 0.001
REM <I/s> 0.389 for 18 systematic absences, Orientation as input
REM Flack x = -0.393 ( 0.947 ) from 406 Parsons' quotients
REM Formula found by SHELXT: C13 N3 O3 Na
CELL 0.71073 6.0608 13.2312 13.6082 90 90 90
ZERR 4 0.0009 0.0022 0.002 0 0 0
LATT -1
SYMM 0.5-X,-Y,0.5+Z
SYMM -X,0.5+Y,0.5-Z
SYMM 0.5+X,0.5-Y,-Z
SFAC C H N Na O
UNIT 36 24 20 4 20
SADI Na1 H5a Na1 H5b

L.S. 10
PLAN  5
SIZE 0.44 0.31 0.09
TEMP 22(2)
CONF
list 4
fmap 2 53
MORE -1
ACTA
BOND $H
OMIT 2 14 3
OMIT 3 14 4
OMIT -6 9 5
OMIT -2 5 14
OMIT 2 8 14
OMIT 6 9 1
OMIT -4 7 13
OMIT 1 8 15
OMIT -5 10 8
REM <olex2.extras>
REM <HklSrc "%.\\exp_809.hkl">
REM </olex2.extras>

WGHT    0.052300
FVAR       0.97786
NA1   4   -0.058189    0.144364    0.551642    11.00000    0.04983    0.05302 =
         0.04545   -0.01095   -0.00952    0.00836
O2    5    0.109071    0.345315    0.549525    11.00000    0.03890    0.04198 =
         0.03987   -0.00665   -0.00103   -0.00275
O1    5    0.830911    0.572958    0.512432    11.00000    0.04598    0.04887 =
         0.04189   -0.01025    0.01027   -0.01087
O4    5   -0.393814    0.339500    0.764106    11.00000    0.04764    0.05666 =
         0.05099   -0.00164    0.01452   -0.00873
N005  3   -0.246993    0.330965    0.700137    11.00000    0.04386    0.03136 =
         0.04114    0.00452   -0.00240   -0.00160
AFIX   6
O5    5    0.289822    0.139512    0.606860    11.00000    0.04729    0.07194 =
         0.05255    0.00637   -0.00052   -0.00623
H5A   2    0.336255    0.140965    0.665810    11.00000   -1.50000
H5B   2    0.405546    0.131874    0.572374    11.00000   -1.50000
AFIX   0
N1    3    0.265916    0.464171    0.647438    11.00000    0.03387    0.02673 =
         0.03500   -0.00627   -0.00523    0.00039
O3    5   -0.274840    0.274618    0.628959    11.00000    0.05549    0.05334 =
         0.05777   -0.02075    0.00038   -0.01195
N6    3    0.133677    0.516870    0.804591    11.00000    0.04618    0.04128 =
         0.03580   -0.00529    0.00008   -0.00666
N4    3    0.457461    0.582183    0.723227    11.00000    0.04348    0.03574 =
         0.03494   -0.00678   -0.00264   -0.00686
N2    3    0.435318    0.486057    0.584440    11.00000    0.02995    0.03490 =
         0.03601    0.00209    0.00238   -0.00459
C9    1    0.101284    0.393444    0.627670    11.00000    0.03845    0.02255 =
         0.03315    0.00069    0.00341    0.00400
C10   1    0.739235    0.604964    0.598422    11.00000    0.04627    0.02845 =
         0.04081    0.00510   -0.00001    0.00227
C5    1    0.282394    0.522227    0.729595    11.00000    0.04634    0.03242 =
         0.02690   -0.00148    0.00106    0.00441
C3    1    0.544125    0.557217    0.635157    11.00000    0.04327    0.02972 =
         0.03591   -0.00220   -0.00865   -0.00240
C7    1   -0.027237    0.453279    0.789662    11.00000    0.04045    0.03543 =
         0.04061    0.00034    0.01038    0.00310
C8    1   -0.055024    0.392533    0.706023    11.00000    0.03743    0.02701 =
         0.03682   -0.00269    0.00374   -0.00541
C13   1    1.016364    0.632248    0.498937    11.00000    0.04754    0.05507 =
         0.04654    0.00015    0.00116   -0.00389
C11   1    0.863502    0.680979    0.637441    11.00000    0.04352    0.03690 =
         0.04093   -0.00471    0.00175   -0.01292
C12   1    1.044010    0.695595    0.571605    11.00000    0.04412    0.05459 =
         0.05110    0.00843   -0.00698   -0.00972
AFIX  43
H12   2    1.159204    0.741403    0.578991    11.00000   -1.20000
AFIX   0
H11   2    0.836007    0.719796    0.705094    11.00000    0.04656
H7    2   -0.122208    0.444437    0.837648    11.00000    0.06110
H13   2    1.074114    0.604841    0.439233    11.00000    0.06764
HKLF 4


REM  exp_809_a.res in P2(1)2(1)2(1)
REM wR2 = 0.1840, GooF = S = 1.015, Restrained GooF = 1.015 for all data
REM R1 = 0.0687 for 1393 Fo > 4sig(Fo) and 0.1250 for all 2378 data
REM 196 parameters refined using 1 restraints

END

WGHT      0.0443      0.0000

REM Highest difference peak  0.285,  deepest hole -0.366,  1-sigma level  0.073
Q1    1  -0.3947  0.4014  0.6791  11.00000  0.05    0.28
Q2    1   0.0767  0.3242  0.5541  11.00000  0.05    0.27
Q3    1   0.1878  0.3217  0.6062  11.00000  0.05    0.25
Q4    1  -0.0456  0.1452  0.6453  11.00000  0.05    0.25
Q5    1   0.4326  0.3980  0.6560  11.00000  0.05    0.24
;
_shelx_res_checksum                29869
_shelx_hkl_file
;
   0   0  -3   -0.82    2.56
   0   0   3   16.08    7.22
   0   0   4    4.87    4.89
   0   0   5    1.39    2.68
   0   0   6  736.01   59.70
   0   0   7   -8.33   11.44
   0   0   8  122.94   28.06
   0   0   9  -15.03   14.78
   0   0  10   29.77   20.63
   0   0  11    5.05    3.83
   0   0  12  628.49   77.09
   0   0  13   -1.93    0.41
   0   0  14  349.62   58.90
   0   0  15   -4.99    5.82
   0   0  16   35.16   18.76
   0   0  17  -18.30   15.29
   0  -1  -3  661.01   41.80
   0   1  -3  701.09   42.71
   0  -1   3  607.23   40.36
   0   1   3  639.09   42.30
   0   1   4   -3.38    9.97
   0  -1   4   11.70    6.67
   0   1   5  540.31   46.20
   0  -1   5  536.03   46.41
   0   1   6  495.93   46.75
   0  -1   6  525.96   47.71
   0   1   7  103.41   22.24
   0  -1   7  101.71   21.30
   0  -1   8  -10.68   12.70
   0   1   8  -33.09   20.88
   0  -1   9  585.81   61.95
   0   1   9  538.58   60.47
   0  -1  10  414.71   54.28
   0   1  10  411.86   54.17
   0   1  11  182.48   38.96
   0  -1  11  156.66   35.48
   0  -1  12  156.84   38.23
   0   1  12  162.54   39.59
   0   1  13  608.51   77.35
   0  -1  13  570.40   74.46
   0  -1  14  152.28   38.53
   0   1  14  139.00   35.09
   0   1  15   16.86   13.11
   0  -1  15   15.88    0.86
   0   1  16   58.96   27.33
   0  -1  16   57.17   26.89
   0   1  17    0.01    1.62
   0  -1  17   21.68   22.78
   0   2  -2 1757.03   75.40
   0  -2  -2 1942.74   74.89
   0  -2   2 1567.25   72.77
   0   2   2 1802.16   76.63
   0  -2   3 5288.40  197.23
   0   2   3 4886.55  192.78
   0   2  -3 5323.16  194.10
   0  -2  -3 4764.68  189.93
   0  -2   4  369.13   33.92
   0   2   4  387.79   35.61
   0   2   5  109.26   21.18
   0  -2   5  132.09   26.10
   0   2   6  125.05   23.41
   0  -2   6  132.24   21.36
   0   2   7   64.20   15.17
   0  -2   7  140.14   25.19
   0   2   8  -21.62   16.69
   0  -2   8   16.64   10.23
   0  -2   9   -8.06    7.05
   0   2   9   19.86   15.30
   0  -2  10  269.75   43.76
   0   2  10  264.09   43.69
   0  -2  11   14.29    9.87
   0   2  11   -6.09   11.05
   0  -2  12   24.59   15.93
   0   2  12   19.04    8.39
   0   2  13   21.40    3.16
   0  -2  13   60.32   25.53
   0  -2  14   92.89   31.02
   0   2  14   83.71   29.39
   0   2  15   -4.04    8.03
   0  -2  15    0.13    4.30
   0  -2  16   52.75   26.92
   0   2  16   47.55   26.63
   0  -2  17  -17.28   14.75
   0   2  17   13.50   13.26
   0   3   0   15.14    6.33
   0  -3   0    0.23    2.85
   0   3   1  121.13   17.49
   0  -3   1  143.10   10.14
   0  -3   1  128.53   17.04
   0   3  -1  116.87   16.86
   0   3  -1  109.01    8.88
   0  -3  -1  120.77   15.47
   0  -3   2   64.18    8.21
   0   3  -2   65.77    9.79
   0   3   2   77.33   10.68
   0  -3  -2   76.47    9.72
   0   3  -3  206.89   21.23
   0  -3  -3  184.38   19.50
   0   3   3  147.49   18.65
   0  -3   3  192.81   20.83
   0   3   4 1781.88   90.16
   0  -3   4 1722.73   87.47
   0  -3   5  873.32   60.27
   0   3   5  885.69   61.98
   0   3   6  247.85   33.15
   0  -3   6  234.86   30.55
   0  -3   7  330.11   38.81
   0   3   7  387.14   46.04
   0  -3   8    5.14    5.65
   0   3   8   -5.46   10.74
   0  -3   9 1103.29   88.86
   0   3   9 1173.35   94.93
   0  -3  10   39.96   11.05
   0   3  10   21.95   12.54
   0   3  11   18.55   14.60
   0  -3  11   -1.24    7.55
   0  -3  12  173.00   38.05
   0   3  12  203.52   42.78
   0   3  13   87.22   28.76
   0  -3  13   95.57   28.45
   0  -3  14  380.17   61.14
   0   3  14  377.17   62.93
   0  -3  15   37.01   20.19
   0   3  15   13.76   11.58
   0   3  16   52.71   28.02
   0  -3  16  109.56   35.69
   0  -3  17  -15.61   13.98
   0   3  17    0.01    8.82
   0   4   0 5262.39  209.87
   0   4  -1  663.40   51.26
   0   4   1  694.38   53.18
   0   4  -2 1978.21   84.53
   0   4   2 1989.64   82.34
   0  -4  -2 2029.53   82.26
   0  -4   2 1990.02   82.14
   0   4   2 2149.07  105.01
   0  -4  -3 2124.36   84.03
   0  -4   3 1886.77   82.80
   0   4   3 1902.81   84.68
   0   4   4  901.27   58.04
   0  -4   4  938.09   56.31
   0   4   5  627.15   49.18
   0  -4   5  592.75   47.39
   0   4   6  164.79   25.56
   0  -4   6  186.88   27.90
   0  -4   7   35.93   12.31
   0   4   7   29.79   10.06
   0   4   8   23.90   12.34
   0  -4   8  -32.53   15.57
   0  -4   9   61.82   17.98
   0   4   9   62.82   18.81
   0  -4  10    5.38    0.71
   0   4  10   14.08    9.25
   0   4  11  119.00   32.25
   0  -4  11  112.61   25.55
   0   4  12  100.06   26.76
   0  -4  12  106.00   28.71
   0  -4  13   30.94   16.07
   0   4  13   23.45   14.78
   0   4  14   24.08   12.03
   0  -4  14   26.61   13.93
   0  -4  15    4.06    6.15
   0   4  15   10.03   13.74
   0  -4  16   19.34   12.94
   0   4  16   50.93   24.99
   0   5   0    7.72    9.61
   0   5   1 2454.03  126.81
   0   5  -1 2609.18  131.96
   0  -5   2  468.57   25.95
   0  -5  -2  468.45   27.94
   0   5   2  518.93   49.54
   0   5  -2  579.42   52.69
   0   5  -2  250.61   23.40
   0   5   2  487.98   27.34
   0  -5   3  389.16   28.92
   0   5   3  348.30   37.13
   0   5  -3  200.82   23.47
   0  -5  -3  401.13   28.91
   0   5   3  326.39   28.05
   0  -5   4 1184.73   67.19
   0   5   4 1173.13   69.16
   0  -5   5  272.39   32.66
   0   5   5  242.77   28.78
   0   5   6  220.71   31.99
   0  -5   6  227.34   30.22
   0   5   7 1291.34   91.52
   0  -5   7 1285.95   87.96
   0  -5   8   34.94   12.99
   0   5   8   15.02    9.70
   0  -5   9    9.79    6.43
   0   5   9   -0.42    4.24
   0  -5  10  175.87   35.38
   0   5  10  177.13   36.85
   0   5  11  199.62   40.48
   0  -5  11  176.69   35.87
   0   5  12  130.50   34.25
   0  -5  12  120.84   31.97
   0  -5  13  155.37   39.71
   0   5  13  123.66   33.86
   0  -5  14   12.11   10.26
   0   5  14    8.71   10.01
   0  -5  15   15.73   13.19
   0   5  15    6.22    9.80
   0  -5  16   12.37   11.90
   0   5  16   38.85   21.96
   0   6   0 2270.11  125.76
   0   6   1   11.94   11.87
   0   6  -1   -7.25   10.37
   0   6   2   15.12   13.48
   0   6  -2  -12.20    8.89
   0   6   3 1114.91   58.88
   0  -6  -3 1243.67   61.31
   0  -6   3 1166.18   57.89
   0   6  -3  942.24   59.87
   0   6   3 1276.58   87.72
   0   6   4  101.68   17.97
   0   6   4  123.90   25.09
   0  -6   4  111.62   16.32
   0  -6   5   67.57   13.83
   0   6   5   43.71   10.84
   0  -6   6  561.53   49.15
   0   6   6  487.06   49.24
   0  -6   7   51.44   14.72
   0   6   7   36.45   12.71
   0   6   8  763.25   70.53
   0  -6   8  833.19   69.86
   0   6   9   56.62   19.62
   0  -6   9   48.05   16.29
   0   6  10  138.34   32.45
   0  -6  10  171.03   32.37
   0   6  11    5.22    4.81
   0  -6  11    5.29    7.42
   0   6  12    5.03    2.85
   0  -6  12    0.31    2.73
   0   6  13    5.48    8.28
   0  -6  13    7.91    4.63
   0   6  14   24.84   16.14
   0  -6  14    8.01    9.06
   0  -6  15  -19.92   17.61
   0   6  15   -7.08    9.06
   0  -6  16  -29.70   18.40
   0   6  16   30.93   19.76
   0   7   0   -4.94   10.30
   0   7  -1   70.18   19.81
   0   7   1   59.59   15.03
   0   7  -2 2103.63  138.00
   0   7   2 1661.20  114.47
   0   7   3  366.43   28.04
   0   7   3  434.34   52.85
   0  -7   4   31.38    6.93
   0   7   4   31.29    5.59
   0   7   4   31.75    7.65
   0  -7   5   17.70    7.83
   0   7   5   43.50   17.97
   0   7   5    7.56    3.56
   0  -7   6    2.26    2.36
   0   7   6    0.46    5.51
   0   7   6   11.41    8.63
   0  -7   7   39.87   16.04
   0   7   7    9.64    8.05
   0   7   8   11.88    5.74
   0  -7   8   14.82    9.26
   0  -7   9   98.74   23.92
   0   7   9  100.38   25.21
   0  -7  10  163.55   33.26
   0   7  10  165.23   35.13
   0   7  11  285.71   50.03
   0  -7  11  288.71   46.50
   0   7  12    5.19    5.99
   0  -7  12   -7.96   10.61
   0   7  13    0.80    3.54
   0  -7  13   13.03   12.54
   0   7  14   23.94   17.66
   0  -7  14    3.91    6.97
   0   7  15    0.01    9.91
   0  -7  15    1.07    6.94
   0   8   0   88.90   22.81
   0   8  -1   64.85   20.35
   0   8   1   50.78    5.60
   0   8  -2  278.26   48.06
   0   8   2  202.08   35.08
   0   8   3  149.67   31.03
   0   8   4   80.23   26.30
   0  -8   5  245.17   26.02
   0   8   5  205.70   25.92
   0   8   5  294.08   44.68
   0   8   6  162.37   33.62
   0   8   6  142.94   25.04
   0  -8   6  175.88   24.47
   0   8   7   12.96    9.94
   0  -8   7   -3.29    3.39
   0   8   7   11.28   11.46
   0   8   8   73.99   26.96
   0  -8   8   67.72   16.87
   0   8   8   61.81   18.53
   0   8   9   51.87   18.01
   0  -8   9   57.01   16.75
   0  -8  10   18.67   10.20
   0   8  10   39.80   18.22
   0   8  11   28.74   13.27
   0  -8  11   38.86   16.53
   0  -8  12   -2.35    1.48
   0   8  12   -2.37    9.78
   0  -8  13   50.11   21.02
   0   8  13   17.37    6.16
   0   8  14    9.36   10.17
   0  -8  14   12.15   10.36
   0   8  15   18.77   26.17
   0  -8  15   51.13   24.18
   0   9   0   -4.45    5.57
   0   9   1 2419.60  156.10
   0   9  -1 2686.22  163.98
   0   9   2  101.43   28.48
   0   9  -2  143.23   35.39
   0   9   3    8.51    7.37
   0   9   4    6.70    7.96
   0   9   5  132.08   30.88
   0   9   6   22.20   14.28
   0  -9   6   22.27   10.30
   0   9   6   20.76   11.29
   0   9   7   48.12   18.17
   0   9   7   42.89   15.14
   0  -9   7   38.42   13.56
   0   9   8  407.48   49.21
   0  -9   8  381.19   45.20
   0   9   8  366.01   57.00
   0   9   9  135.27   34.91
   0   9   9  141.44   30.98
   0  -9   9  123.43   26.66
   0   9  10   27.40   16.48
   0  -9  10   40.35   14.38
   0   9  10   41.71   19.09
   0   9  11   29.85   13.53
   0  -9  11   -0.09    8.45
   0   9  12   -4.86   10.46
   0  -9  12    5.27    2.72
   0   9  13    9.25   13.87
   0  -9  13   19.70   17.06
   0  -9  14   20.79   15.19
   0   9  14    9.86    9.63
   0  10   0  320.36   53.62
   0  10   1    0.29    4.22
   0  10  -1   -0.79   13.57
   0  10  -2   38.12   16.34
   0  10   2   63.48   22.91
   0  10   3  220.38   40.72
   0  10   4  123.72   32.24
   0  10   5  381.44   61.91
   0  10   6   38.85   20.07
   0  10   7   78.22   28.76
   0  10   8   -5.68   11.48
   0  10   9  211.54   44.11
   0  10   9  236.79   39.18
   0  10  10  288.44   53.78
   0  10  10  343.38   50.39
   0 -10  10  303.54   43.48
   0 -10  11   -7.66    4.08
   0  10  11    2.35    8.19
   0  10  11    4.18    5.36
   0  10  12   59.38   26.32
   0  10  13   11.56    6.28
   0  10  14   -1.23    4.05
   0  11   0   36.93   18.03
   0  11  -1  -28.60   22.20
   0  11   1   21.13   16.27
   0  11  -2  247.47   51.37
   0  11   2  229.20   46.65
   0  11   3  258.86   48.31
   0  11   4   57.18   24.02
   0  11   5   33.16   19.49
   0  11   6  266.33   53.59
   0  11   7  104.00   34.96
   0  11   8  198.23   45.79
   0  11   9  131.70   35.82
   0  11  10    5.47    4.82
   0  11  11   -4.58    4.47
   0  11  12    6.90   10.10
   0  11  13  -14.13    9.33
   0  12   0   40.39   22.95
   0  12  -1  -13.40    9.84
   0  12   1   21.86   12.69
   0  12  -2   57.07   29.09
   0  12   2   27.96   23.71
   0  12   3  145.14   37.62
   0  12   4  186.20   42.92
   0  12   5   15.23   10.74
   0  12   6   -3.81   11.61
   0  12   7   36.68   19.61
   0  12   8   10.64   13.04
   0  12   9   18.27   15.15
   0  12  10    5.42   12.12
   0  12  11   -4.05    9.04
   0  12  12   13.16   18.48
   0  13   0    6.07   14.83
   0  13   1   35.32   25.06
   0  13  -1   44.28   23.06
   0  13  -2  118.92   37.73
   0  13   2   76.27   33.92
   0  13   3   32.02   19.30
   0  13   4  -12.43    9.75
   0  13   5   68.84   24.58
   0  13   6   55.73   23.75
   0  13   7   29.55   20.70
   0  13   8   -2.01    6.84
   0  13   9  -22.38   21.26
   0  13  10    2.04    2.73
   0  13  11   47.44   27.47
   0  14   0   -9.28   24.98
   0  14  -1   21.81   14.52
   0  14   1   29.95   22.62
   0  14   2  268.92   58.02
   0  14  -2  307.38   64.09
   0  14   3  272.99   61.01
   0  14   4   94.04   33.12
   0  14   5  -10.00   15.58
   0  14   6   -0.95    9.66
   0  14   7    5.48    6.96
   0  14   8    2.54   10.44
   0  14   9    0.01    5.56
   0  15   0  -11.65   13.04
   0  15   1  129.82   42.43
   0  15  -1  175.32   53.48
   0  15   2  189.89   51.68
   0  15   3   11.87   13.26
   0  15   4   17.46   15.75
   0  15   5  112.48   40.78
   0  15   6    8.18    9.31
   0  15   7   -9.95   10.52
   0  15   8    0.01   13.37
   0  16   0  108.00   48.20
   0  16  -1  355.51   79.13
   0  16   1  313.02   70.96
   0  16   2   53.17   33.30
   0  16   3  105.81   43.58
   0  16   4   -0.01    4.64
   0  16   5   32.06   24.12
  -1   0   1  263.95   21.89
   1   0   1  327.64   26.59
  -1   0  -1  267.62   22.02
   1   0  -1  299.82   25.23
   1   0  -2   18.52    3.86
  -1   0   2    3.07    6.46
  -1   0  -2   57.03   11.33
   1   0   2   45.73    9.59
  -1   0  -3 1799.85   83.31
   1   0  -3 2248.66   92.41
   1   0   3 2105.07   91.09
  -1   0   3 1870.20   84.38
   1   0  -4  631.65   38.39
   1   0   4  482.27   44.81
   1   0   4  573.27   37.93
  -1   0   4  427.87   29.46
  -1   0  -4  451.45   30.42
   1   0   5  621.01   37.83
   1   0  -5  437.93   33.14
  -1   0   5  499.53   45.15
   1   0   5  536.04   49.96
  -1   0   5  532.25   32.19
  -1   0  -5  492.81   31.73
   1   0   6   74.49   21.22
  -1   0  -6   74.78   11.59
  -1   0   6   47.78   12.98
  -1   0   7 3093.30  159.00
   1   0   7 3266.72  162.97
  -1   0   8   80.48   23.81
   1   0   8   86.28   22.33
   1   0   9   67.04   21.65
  -1   0   9   41.60   12.93
   1   0  10    3.52    0.29
  -1   0  10    1.81    3.05
  -1   0  11   71.03   21.85
   1   0  11   83.51   26.83
  -1   0  12  378.30   58.05
   1   0  12  392.93   61.91
   1   0  13  396.92   63.46
  -1   0  13  371.95   57.69
   1   0  14  169.37   40.93
  -1   0  14  181.95   42.30
  -1   0  15  107.50   34.85
   1   0  15   88.11   33.82
   1   0  16  149.76   45.00
   1   0  17   21.63   17.46
   1  -1  17    6.00    9.16
   1  -1  16   32.07   23.03
  -1   1  15  -27.91   20.07
   1  -1  15   24.41   17.38
  -1   1  14   59.13   23.54
   1  -1  14   84.17   30.76
  -1   1  13   38.96   17.25
   1  -1  13   37.65   17.04
   1  -1  12  111.85   35.14
  -1   1  12  135.80   35.32
   1  -1  11   39.62   18.28
  -1   1  11   46.35   18.08
  -1   1  10  586.12   64.35
   1  -1  10  732.38   78.42
   1  -1   9   68.89   24.08
  -1   1   9   63.66   21.07
  -1   1   8  361.29   45.30
   1   1  -8  246.37   22.73
   1  -1   8  359.36   45.72
  -1   1   8  389.84   23.75
  -1   1   7  931.15   43.35
  -1   1   7  949.94   71.84
   1   1  -7  592.22   41.72
   1  -1   7  955.93   71.65
  -1   1   6 1341.85   58.25
   1  -1   6 1520.84   91.02
  -1   1   6 1284.65   79.75
  -1   1   5  211.34   18.76
   1   1  -5  178.85   20.75
   1  -1   5  158.05   22.94
  -1   1   5  192.50   27.05
   1  -1   4   50.21   15.91
   1   1  -4   62.84   11.06
  -1   1   4   33.21    8.00
  -1   1   3 4835.19  189.29
   1   1  -3 5334.29  194.28
   1   1  -2  808.71   47.84
  -1   1   2  880.24   49.25
   1   1  -1  593.13   40.11
  -1   1   1  445.40   31.32
  -1  -1  -1  519.39   35.53
  -1  -1   0    8.45    3.30
  -1   1   0   13.16    3.31
   1   1   0    9.00    5.96
   1  -1   0    3.70    1.53
   1   1   0    7.29    2.72
  -1   1  -1  480.90   34.00
   1   1   1  601.96   39.58
  -1  -1   1  465.02   33.60
  -1   1  -2  664.93   41.15
   1   1   2  751.59   45.31
   1   1   3 5155.19  191.01
  -1   1  -3 4872.31  188.71
   1   1   4   41.15    9.39
  -1   1  -4   36.92    8.32
   1   1   4   68.71   19.92
   1   1   5  227.00   22.54
  -1   1  -5  209.70   19.57
   1   1   5  187.50   26.83
  -1  -1   5  180.63   24.98
  -1  -1   6 1197.68   83.14
   1   1   6 1456.40   71.44
  -1   1  -6 1571.06   70.44
   1   1   6 1465.59   96.16
  -1  -1   7  905.62   70.84
   1   1   7  843.37   50.78
   1   1   7 1008.86   76.84
  -1   1  -7 1070.66   51.01
  -1  -1   8  327.59   43.12
   1   1   8  335.05   46.06
  -1   1  -8  414.63   26.78
   1   1   9   67.12   22.61
  -1  -1   9   45.26   18.24
  -1  -1  10  646.78   67.48
   1   1  10  638.14   73.88
   1   1  11   58.74   22.58
  -1  -1  11   47.66   19.11
   1   1  12   89.75   25.92
  -1  -1  12  121.69   32.92
   1   1  13   36.35   17.98
  -1  -1  13   40.78   17.51
  -1  -1  14   73.20   25.82
   1   1  14   58.27   22.71
  -1  -1  15   29.25   19.85
   1   1  15   -7.88    7.87
   1   1  16   55.55   31.22
   1   1  17   11.67   18.18
   1  -2  17   -2.26    5.57
   1  -2  16   39.40   18.53
   1  -2  15   17.68   17.97
  -1   2  15   28.84   21.53
  -1   2  14   -0.51   12.02
   1  -2  14   -6.86    2.42
  -1   2  13   44.09   20.90
   1  -2  13   18.06   12.30
   1  -2  12  495.57   69.41
  -1   2  12  466.29   64.01
  -1   2  11  295.91   48.16
   1  -2  11  325.30   53.92
   1  -2  10  192.62   38.15
  -1   2  10  172.79   34.52
   1  -2   9  141.38   30.77
   1   2  -9   98.50   14.55
  -1   2   9  134.05   13.73
  -1   2   9  112.85   24.25
   1   2  -8    1.46    2.25
   1  -2   8   12.90   10.19
  -1   2   8    6.71    3.61
  -1   2   8   24.69   11.16
   1  -2   7  333.62   40.39
  -1   2   7  333.95   26.97
   1   2  -7  271.88   27.87
  -1   2   7  278.33   36.87
   1   2  -6  562.89   42.32
   1  -2   6  573.26   53.39
  -1   2   6  549.36   37.67
  -1   2   6  461.41   46.57
   1  -2   5  167.49   24.60
   1   2  -5  232.73   25.57
   1  -2   4 1412.15   82.40
   1  -2   1 2227.24   95.45
  -1   2   1 2190.31   91.97
  -1   2   0   27.68    3.91
   1  -2   0   23.07    5.68
   1   2   0   42.80    7.67
  -1  -2   0   66.75   11.32
   1   2   1 1850.71   83.16
  -1  -2   1 2028.62   83.39
   1   2   4 1756.74   86.19
   1   2   4 1360.16   87.89
   1   2   5  238.35   25.91
   1   2   5  155.90   24.27
  -1  -2   6  496.67   49.32
   1   2   6  487.83   37.59
  -1   2  -6  579.28   38.88
   1   2   6  502.80   51.17
   1   2   7  313.82   41.13
   1   2   7  160.97   20.69
  -1   2  -7  366.38   28.72
  -1  -2   7  271.23   35.37
   1   2   8    0.18    0.92
   1   2   8    8.93    8.33
  -1   2  -8    3.72    1.22
  -1  -2   8   22.30   13.24
   1   2   9  104.45   14.00
  -1   2  -9  151.78   16.02
   1   2   9  133.52   28.96
  -1  -2   9  127.25   28.73
   1   2  10  216.31   40.77
  -1   2 -10  245.34   18.28
  -1  -2  10  201.48   37.71
   1   2  11  355.22   56.93
  -1  -2  11  253.40   41.18
  -1  -2  12  417.00   58.82
   1   2  12  495.45   69.92
  -1  -2  13   28.68   14.73
   1   2  13   24.24   16.80
   1   2  14   17.55   12.09
  -1  -2  14   -7.15   10.84
   1   2  15   -0.63   17.25
  -1  -2  15   -6.41   14.81
   1   2  16   22.28   15.28
   1   2  17   35.71   22.62
   1  -3  17   31.44   23.97
   1  -3  16  -22.92   17.91
   1  -3  15   52.97   24.22
  -1   3  15   26.52   16.07
   1  -3  14   75.75   28.08
  -1   3  14   41.69   20.14
   1  -3  13   62.87   24.13
  -1   3  13   99.58   28.82
   1  -3  12  161.00   39.42
  -1   3  12  143.02   34.12
   1  -3  11   75.92   25.46
  -1   3  11   69.17   23.87
   1  -3  10  394.95   56.00
  -1   3  10  393.30   30.72
  -1   3  10  371.00   52.71
  -1   3   9  662.70   42.89
   1   3  -9  585.92   44.02
   1  -3   9  633.06   68.94
  -1   3   9  552.10   62.79
   1   3  -8  412.42   39.85
  -1   3   8  320.49   43.85
   1  -3   8  300.65   42.55
  -1   3   8  365.76   32.54
  -1   3   7  322.36   40.84
   1  -3   7  317.21   39.69
   1  -3   6  102.68   21.65
  -1   3   6   93.78   19.13
   1  -3   5  679.21   55.81
   1  -3   4  624.44   49.09
  -1   3   2 7420.62  276.95
  -1  -3  -1 4694.41  192.34
   1   3  -1 5465.43  203.19
  -1   3   1 4848.86  194.46
   1  -3   1 5349.67  201.28
   1   3   0 9494.14  343.33
  -1   3   0 9422.33  340.28
  -1  -3   0 9999.00  343.65
   1  -3  -1 5326.64  196.64
  -1   3  -1 4934.11  194.33
  -1  -3   1 4710.37  190.30
   1   3   1 4783.81  194.40
   1   3   2 8147.59  305.07
   1   3   4  602.22   49.93
   1   3   5  680.52   54.59
   1   3   6  103.52   21.71
  -1  -3   6  160.07   28.38
   1   3   7  353.58   45.20
  -1  -3   7  305.05   38.60
  -1  -3   8  298.16   41.00
   1   3   8  311.03   32.46
   1   3   8  345.53   46.42
  -1   3  -8  409.93   33.90
   1   3   9  513.10   40.55
  -1   3  -9  755.36   47.72
  -1  -3   9  528.45   58.59
   1   3   9  603.13   67.16
  -1   3 -10  507.20   35.58
   1   3  10  418.98   60.18
  -1  -3  10  346.35   49.21
  -1  -3  11   49.97   18.16
   1   3  11   70.93   25.84
  -1  -3  12  157.75   36.45
   1   3  12  154.38   39.73
   1   3  13  107.58   33.23
  -1  -3  13   60.47   20.43
  -1  -3  14   75.15   25.94
   1   3  14   91.65   31.44
   1   3  15   24.02   15.56
  -1  -3  15   19.36   11.82
   1   3  16   -3.68    7.03
   1   3  17   12.27   17.87
   1  -4  16    5.16   12.75
   1  -4  15   64.83   27.23
   1  -4  14  160.93   41.97
  -1   4  14  126.17   33.76
  -1   4  13   92.08   28.50
   1  -4  13   74.10   24.97
  -1   4  12  158.63   36.59
   1  -4  12  171.09   39.47
   1  -4  11  160.34   37.84
  -1   4  11  182.81   38.34
  -1   4  10  134.12   19.22
  -1   4  10   95.46   23.65
   1  -4  10  116.04   29.92
   1  -4   9  135.02   30.82
  -1   4   9  123.74   27.88
   1  -4   8   90.25   22.63
  -1   4   8   71.34   20.50
  -1   4   7  548.58   53.33
   1  -4   7  535.80   55.65
   1  -4   6  413.97   44.19
   1  -4   5  178.08   27.03
   1  -4   4   19.47    6.67
  -1   4   3 3362.83  155.36
   1  -4   3 3391.96  145.85
  -1   4   2 1913.04   98.51
   1   4  -1 1843.75   98.98
  -1   4   1 1690.80   90.80
  -1   4   0 5081.29  205.04
   1   4   0 5261.53  211.36
   1   4   1 1957.57  100.54
  -1   4  -1 1680.00   93.61
   1   4   2 1930.41  101.73
   1   4   3 3086.80  137.16
   1   4   4   18.66    7.48
   1   4   5  174.18   26.10
   1   4   6  431.87   46.20
  -1  -4   7  487.78   50.60
   1   4   7  537.77   55.93
   1   4   8   79.11   22.42
  -1  -4   8   66.58   17.18
  -1  -4   9  102.05   24.72
   1   4   9  115.31   26.92
  -1   4 -10  147.64   22.07
   1   4  10   93.12   26.79
  -1  -4  10   76.71   20.98
   1   4  11  216.30   44.91
  -1  -4  11  177.00   35.63
   1   4  12  162.43   38.80
  -1  -4  12  155.30   36.40
  -1  -4  13  104.44   31.60
   1   4  13  112.78   35.53
   1   4  14  117.48   35.99
  -1  -4  14  119.05   33.20
   1   4  15   54.18   27.61
   1   4  16  -50.14   26.03
   1  -5  16   25.29   17.06
   1  -5  15   46.61   22.92
   1  -5  14   26.44   16.37
   1  -5  13   37.04   19.86
   1  -5  12  129.21   37.17
  -1   5  12  102.51   29.32
   1  -5  11  152.04   34.52
  -1   5  11  156.93   35.87
  -1   5  10  107.42   27.05
   1  -5  10   95.48   27.51
   1  -5   9  135.34   30.72
  -1   5   9  113.09   26.90
   1  -5   8   54.32   18.54
   1  -5   7  323.97   41.73
   1  -5   6 1558.73   96.11
   1  -5   5  126.42   20.62
  -1   5   4 1256.11   85.39
   1  -5   4 1169.52   71.78
   1  -5   3  430.78   35.74
  -1   5   3  405.48   41.72
   1   5  -2  252.03   26.15
  -1   5   2  527.78   46.04
   1   5  -1  274.39   34.82
  -1   5   1  282.79   32.88
  -1   5   0  488.50   44.64
   1   5   0  543.56   48.68
  -1   5  -1  280.17   33.23
   1   5   1  266.99   30.55
   1  -5  -2  534.38   35.62
   1   5   2  562.76   51.60
   1   5   3  415.16   43.57
   1   5   3  428.61   37.10
   1   5   4 1081.08   67.70
   1   5   5  114.97   22.07
   1   5   6 1501.38   96.07
   1   5   7  312.27   42.25
   1   5   8   59.50   19.29
   1   5   9  132.58   32.00
  -1  -5   9  110.61   26.66
   1   5  10  121.90   31.26
  -1  -5  10   98.97   26.46
   1   5  11  176.22   41.06
  -1  -5  11  159.21   34.77
   1   5  12   97.01   28.48
  -1  -5  12  107.82   28.57
   1   5  13   11.19    9.13
   1   5  14   -6.50   12.05
   1   5  15   62.26   30.51
   1   5  16    0.01   14.72
   1  -6  16    0.01   10.67
   1  -6  15   -9.68   21.22
   1  -6  14   84.01   30.03
   1  -6  13   97.61   33.63
   1  -6  12    0.20    3.25
   1  -6  11   40.28   20.18
   1  -6  10  109.71   28.58
   1  -6   9   23.52    4.20
   1  -6   8   29.85   16.35
   1  -6   7  533.23   53.59
   1  -6   6   87.89   18.13
   1  -6   5  183.54   24.77
  -1   6   5  167.04   32.44
   1  -6   4  970.98   61.47
  -1   6   4  972.39   75.14
   1  -6   3  407.86   33.73
  -1   6   3  434.44   47.84
   1   6  -2  302.45   43.79
   1   6  -2  191.88   23.15
   1  -6   2  255.84   23.82
  -1   6   2  236.07   34.73
   1   6  -1   63.64   21.58
  -1   6   1    9.01    3.26
   1   6   0   33.95   13.72
  -1   6   0   24.03    4.41
  -1   6  -1   26.28   11.53
   1   6   1   59.89   17.02
  -1   6  -2  302.35   43.66
   1   6   2  257.00   36.39
   1  -6  -2  207.00   20.77
   1   6   3  342.82   34.66
   1  -6  -3  448.61   35.04
   1   6   3  428.35   48.38
   1   6   4  887.92   63.61
   1   6   4 1040.07   79.84
   1   6   5  164.48   31.74
   1   6   5  142.06   22.63
   1   6   6   67.90   17.54
   1   6   7  510.09   56.42
   1   6   8   27.42   14.09
   1   6   9   22.96   12.56
   1   6  10  117.17   31.00
   1   6  11   37.32   18.75
   1   6  12    6.74    5.30
   1   6  13  103.90   33.53
   1   6  14   84.22   33.81
   1   6  15   14.99   19.72
   1   6  16   16.56   14.94
   1  -7  15   28.18   18.52
   1  -7  14    0.74    3.92
   1  -7  13   63.30   27.22
   1  -7  12   18.89   13.28
   1  -7  11  150.23   35.56
   1  -7  10   20.95   11.50
   1  -7   9  511.90   60.16
   1  -7   8  120.54   28.40
   1  -7   7  195.38   31.93
   1  -7   6   92.58   19.73
  -1   7   6   52.76   18.37
  -1   7   5  419.31   51.80
   1  -7   5  505.10   43.76
  -1   7   4   61.96   19.73
   1  -7   4   59.02   12.63
   1   7  -3  574.27   45.64
   1  -7   3  566.35   39.46
  -1   7   3  640.90   64.05
   1  -7   2  796.82   42.92
   1   7  -2  602.70   44.68
  -1   7   2  763.08   68.10
   1   7  -1  287.22   41.68
   1   7  -1  139.27   16.08
  -1   7   1  282.76   36.46
   1   7   0 1195.21   94.61
  -1   7   0 1044.99   84.80
   1   7   1  298.21   40.84
  -1   7  -1  274.03   39.47
   1  -7  -1  181.10   17.60
   1   7   2  792.25   45.25
  -1   7  -2  884.26   78.61
   1   7   2  843.27   73.99
   1  -7  -2  691.58   43.22
   1  -7  -3  432.31   36.40
   1   7   3  593.17   41.84
   1   7   3  710.33   70.93
   1   7   4   48.41   12.34
   1   7   4   46.32   14.47
   1   7   5  470.37   45.13
   1   7   5  482.98   55.85
   1   7   6   68.67   17.08
   1   7   6   94.30   26.72
   1   7   7  186.99   34.09
   1   7   8  111.93   27.83
   1   7   9  531.52   65.56
   1   7  10    8.48   10.58
   1   7  11  154.37   35.85
   1   7  12    6.44    4.23
   1   7  13   50.81   25.04
   1   7  14   23.77   16.82
   1   7  15   24.18   17.52
   1  -8  15   31.55   20.38
   1  -8  14  -13.57   16.24
   1  -8  13   31.55   14.86
   1  -8  12    6.96   10.35
   1  -8  11  157.16   35.90
   1  -8  10   60.22   19.97
   1  -8   9  180.81   33.16
   1  -8   8    9.65   10.86
  -1   8   8   15.19   16.68
  -1   8   7    5.29    4.86
   1  -8   7   17.49    8.42
   1  -8   6   99.68   20.69
  -1   8   6   70.72   21.70
  -1   8   5   -0.63    5.21
   1  -8   5    6.06    6.67
  -1   8   4   70.79   23.88
   1  -8   4   67.85   14.26
   1   8  -3  100.03   17.15
  -1   8   3  124.55   25.27
   1  -8   3  138.18   17.57
   1   8  -2  118.72   16.94
   1   8  -2  224.47   41.63
  -1   8   2  185.38   34.78
   1  -8   2  163.82   15.93
   1   8  -1  220.39   38.96
   1   8  -1  123.03   15.26
   1  -8   1  185.84   14.66
  -1   8   1  195.85   34.39
  -1   8   0  750.60   74.92
   1   8   0  831.00   80.54
   1   8   1  162.09   14.38
  -1   8  -1  177.72   34.53
   1  -8  -1  148.65   12.93
   1   8   1  221.79   39.17
  -1   8  -2  208.38   38.36
   1   8   2  186.92   33.66
   1  -8  -2  161.82   16.54
   1   8   2  165.53   17.06
   1  -8  -3   59.14   11.60
   1   8   3  136.26   32.17
   1   8   3  108.76   15.74
   1   8   4   72.70   25.07
   1   8   4   56.98   13.00
   1   8   5    4.25    9.49
   1   8   5    5.54    5.75
   1   8   6   96.28   21.08
   1   8   6   72.76   23.71
   1   8   7   26.28   13.71
   1   8   7   15.54   11.06
   1   8   8    8.15    8.89
   1   8   8   11.24   10.32
   1   8   9  253.07   43.26
   1   8  10   67.46   24.59
   1   8  11  121.18   33.07
   1   8  12   29.76   18.38
   1   8  13   61.77   26.49
   1   8  14  -19.94   18.41
   1   8  15   -7.22    9.54
   1  -9  14   22.03   15.95
   1  -9  13    9.89    9.97
   1  -9  12   12.30    8.28
   1  -9  11   27.95   13.47
   1  -9  10   42.27   15.45
  -1   9  10   18.01   14.86
   1  -9   9   45.93   14.91
  -1   9   9   45.71   21.83
   1  -9   8  178.63   31.49
  -1   9   8  174.91   39.62
   1  -9   7   24.60    9.36
  -1   9   7    9.05    8.39
  -1   9   6  178.81   37.25
   1  -9   6  154.48   24.31
   1  -9   5   86.78   15.97
  -1   9   5   88.52   26.80
   1  -9   4  485.85   39.61
  -1   9   4  491.11   65.17
   1  -9   3  213.87   21.05
  -1   9   3  200.20   37.10
   1   9  -3  118.65   18.36
  -1   9   2  232.12   39.55
   1   9  -2  354.54   57.68
   1   9  -2  241.48   21.85
   1  -9   2  284.93   20.06
   1   9  -1   27.07   13.79
  -1   9   1   28.86   11.32
   1   9   0   81.15   27.20
  -1   9   0   66.41   22.29
  -1   9  -1   42.14   17.33
   1   9   1   16.30   11.15
   1   9   2  268.71   43.36
  -1   9  -2  289.84   49.09
   1  -9  -2  241.47   17.57
   1   9   2  231.75   21.58
   1   9   3  233.76   43.26
   1   9   3  224.69   24.99
   1  -9  -3  125.61   15.30
   1   9   4  527.82   44.26
   1   9   4  550.60   70.13
   1   9   5  103.18   29.48
   1   9   5   81.76   17.80
   1   9   6  188.92   39.76
   1   9   6  167.25   26.05
   1   9   7   25.60   11.97
   1   9   7   48.77   22.39
   1   9   8  199.70   35.95
   1   9   8  162.57   37.54
   1   9   9   74.02   24.18
   1   9   9   42.96   22.34
   1   9  10   22.57   16.53
   1   9  10   29.90   13.95
   1   9  11   19.77   12.52
   1   9  12   22.37   19.89
   1   9  13   20.14   17.53
   1   9  14   57.33   28.93
  -1  10  13   37.03   21.43
   1 -10  12    8.36    2.98
  -1  10  12   16.99   17.68
  -1  10  11    9.78    6.81
   1 -10  11   22.68   10.45
  -1  10  10  -15.55   14.65
   1 -10  10   18.19   13.94
   1 -10   9  105.18   25.75
  -1  10   9   54.64   19.85
   1 -10   8   55.71   18.67
  -1  10   8   36.38   21.57
  -1  10   7  232.25   46.38
   1 -10   7  212.65   32.17
   1 -10   6   31.12   11.40
  -1  10   6   49.30   22.84
   1 -10   5  387.82   36.33
  -1  10   5  398.06   61.30
   1 -10   4    3.88    3.85
  -1  10   4   -0.21    3.12
  -1  10   3  122.77   29.25
   1 -10   3  144.81   15.06
   1  10  -2  144.95   40.94
  -1  10   2   83.11   26.63
   1  10  -1   86.39   30.22
  -1  10   1   70.28   24.68
  -1  10   0   92.53   28.63
   1  10   0   40.31   14.39
   1  10   1   71.30   25.00
  -1  10  -1   98.50   29.91
  -1  10  -2  123.88   32.24
   1  10   2  118.11   31.46
   1  10   3  111.57   31.76
   1  10   3  133.48   16.51
   1  10   4    7.09    4.42
   1  10   4   -1.37   10.83
   1  10   5  407.04   41.76
   1  10   5  397.59   64.87
   1  10   6   28.71    9.37
   1  10   6   45.84   20.64
   1  10   7  179.00   30.43
   1  10   7  192.90   41.72
   1  10   8   78.02   22.81
   1  10   8   56.57   24.13
   1  10   9  146.29   31.51
   1  10   9   81.16   28.34
   1  10  10    6.27    5.45
   1  10  10  -18.34   15.03
   1  10  11    5.44    8.92
   1  10  11   60.49   25.14
   1  10  12   19.22   16.33
   1  10  13    7.59    2.89
  -1  11  13    4.51   12.49
  -1  11  12   46.95   20.01
  -1  11  11   90.80   32.65
  -1  11  10   34.07   20.75
  -1  11   9   31.79   20.06
  -1  11   8   25.61   19.32
  -1  11   7   18.36   17.24
  -1  11   6   48.43   24.41
  -1  11   5   58.53   24.55
  -1  11   4  272.96   49.02
  -1  11   3   65.21   23.27
   1  11  -2   72.70   30.10
  -1  11   2   83.17   25.54
  -1  11   1  102.09   28.96
   1  11  -1  107.86   28.94
  -1  11   0   22.30   16.92
   1  11   0   34.76   17.23
  -1  11  -1   95.88   30.64
   1  11   1  109.34   36.90
  -1  11  -2   80.46   25.99
   1  11   2   65.01   24.86
   1  11   3   62.04   25.61
   1  11   4  304.28   53.88
   1  11   5   72.79   26.39
   1  11   6   29.26   20.15
   1  11   7   33.52   16.98
   1  11   8   12.95   10.53
   1  11   9   21.79   14.97
   1  11  10    5.75    8.00
   1  11  11   66.71   28.87
   1  11  12   58.40   27.26
   1  11  13   11.38   14.06
  -1  12  12    9.29    6.40
  -1  12  11    5.16    9.42
  -1  12  10   -3.11    2.90
  -1  12   9   71.43   29.17
  -1  12   8   -3.98    6.95
  -1  12   7   92.68   34.11
  -1  12   6   -1.42    6.76
  -1  12   5  227.28   48.05
  -1  12   4  140.39   36.11
  -1  12   3  277.68   53.55
   1  12  -2   74.32   27.34
  -1  12   2   50.73   26.22
   1  12  -1  139.09   41.28
  -1  12   1  126.42   37.90
  -1  12   0    8.96   15.79
   1  12   0   -9.99   13.42
  -1  12  -1  136.87   40.14
   1  12   1  152.11   42.64
  -1  12  -2   39.96   18.86
   1  12   2   45.12   21.70
   1  12   3  309.62   55.95
   1  12   4  179.07   41.52
   1  12   5  243.26   50.86
   1  12   6   -0.39   12.20
   1  12   7  102.23   35.06
   1  12   8   30.89   21.67
   1  12   9   67.87   29.93
   1  12  10   14.21   17.27
   1  12  11    0.01    6.74
   1  12  12    3.00    6.24
  -1  13  10   39.57   23.80
  -1  13   9   -5.22   13.74
  -1  13   8  109.08   35.54
  -1  13   7   20.21   17.62
  -1  13   6   68.96   29.96
  -1  13   5   10.70   12.38
  -1  13   4   85.87   30.17
  -1  13   3  184.54   45.00
   1  13  -2   19.47   14.00
  -1  13   2   28.02   19.27
  -1  13   1   66.54   27.05
   1  13  -1   80.02   30.22
  -1  13   0   33.96   21.93
   1  13   0   41.49   21.94
  -1  13  -1  117.74   40.80
   1  13   1  104.12   36.55
  -1  13  -2   16.67   14.21
   1  13   2    8.18   14.55
   1  13   3  207.54   49.34
   1  13   4  118.76   36.55
   1  13   5   25.55   15.44
   1  13   6   67.04   28.20
   1  13   7   33.44   20.49
   1  13   8  128.09   38.75
   1  13   9   30.16   23.67
   1  13  10  -26.79   19.83
  -1  14   9   22.32   18.52
  -1  14   8   46.82   23.40
  -1  14   7   43.10   22.22
  -1  14   6   10.81   11.37
  -1  14   5   41.24   22.41
  -1  14   4   26.28   16.62
  -1  14   3   69.56   29.23
  -1  14   2   15.02    7.72
  -1  14   1   89.81   34.89
   1  14  -1   78.22   34.70
   1  14   0   59.33   33.36
  -1  14   0   34.10   23.97
  -1  14  -1   78.41   34.92
   1  14   1  105.00   37.77
   1  14   2   31.94   15.01
   1  14   3   49.33   22.71
   1  14   4   22.21   15.73
   1  14   5   65.15   27.41
   1  14   6   -8.39   10.26
   1  14   7   35.39   18.26
   1  14   8   33.13   20.51
   1  14   9   17.59   22.25
  -1  15   7   32.05   19.99
  -1  15   6  108.74   37.75
  -1  15   5   13.97   13.27
  -1  15   4   27.19   24.33
  -1  15   3   38.52   23.73
  -1  15   2  -66.48   33.25
  -1  15   1   38.55   17.78
   1  15  -1   49.24   28.13
  -1  15   0   -7.68   13.83
   1  15   0  -23.12   18.83
  -1  15  -1   39.44   18.68
   1  15   1   74.68   34.04
   1  15   2   -1.67   16.80
   1  15   3   29.90   20.31
   1  15   4  -10.62   21.08
   1  15   5  -15.61   14.90
   1  15   6  120.35   41.41
   1  15   7   24.10   19.81
  -1  16   5   47.48   27.89
  -1  16   4   13.29   10.92
  -1  16   3   17.41   12.78
  -1  16   2    5.77   13.94
   1  16  -1  -20.32   10.39
  -1  16   1   13.60   16.82
   1  16   0  202.73   61.17
  -1  16   0  187.59   56.13
   1  16   1   27.49   26.33
  -1  16  -1    5.08    8.12
   1  16   2   43.83   31.36
   1  16   3   39.97   32.64
   1  16   4  -19.47   17.95
   1  16   5   68.67   36.01
  -2   0   0   78.49   17.16
  -2   0  -1  847.38   55.88
  -2   0   1  784.80   55.95
  -2   0  -2  507.03   41.68
  -2   0   2  471.42   40.21
  -2   0  -3  287.87   30.35
  -2   0   3  286.99   30.83
  -2   0   4 2273.59  110.75
  -2   0  -4 2511.21  115.63
  -2   0  -5 1252.12   70.58
  -2   0   5 1236.73   68.96
  -2   0  -6  351.91   33.81
  -2   0   6  335.03   31.98
   2   0   6  413.61   51.67
  -2   0   7  479.12   41.42
  -2   0  -7  552.62   45.47
   2   0   7  592.23   65.73
  -2   0  -8  806.76   55.82
   2   0   8  768.90   77.34
   2   0   9  219.76   43.06
   2   0  10  103.14   29.19
   2   0  11   13.25    8.89
   2   0  12   31.78   16.40
   2   0  13   71.75   29.41
   2   0  14  122.22   39.30
   2   0  15  -19.07   19.60
   2   0  16   27.02   27.55
   2  -1  16    0.14   14.61
   2  -1  15  291.64   62.37
   2  -1  14   11.52    7.49
   2  -1  13   71.07   27.98
   2  -1  12   25.03   17.15
   2  -1  11   36.58   22.37
   2  -1  10   80.84   26.16
  -2   1   9  309.41   30.94
   2  -1   9  300.34   48.96
  -2   1   8  538.91   42.42
   2  -1   8  740.50   73.30
  -2   1   7   88.11   16.22
   2  -1   7  124.87   27.16
  -2   1   6  259.42   28.19
   2  -1   6  325.84   46.38
  -2   1   5   20.91    9.59
  -2  -1  -5    8.58    5.72
  -2   1   4  171.75   23.68
  -2  -1  -4  177.03   23.50
  -2   1   3 1608.77   88.47
  -2  -1  -3 1697.71   92.19
  -2   1   2  345.05   34.48
  -2  -1  -2  349.57   32.79
  -2   1   1  558.91   45.11
  -2  -1  -1  486.87   42.08
   2  -1   1  530.67   30.76
  -2   1   1  494.75   25.60
  -2  -1   0  551.42   43.84
  -2   1   0  607.92   47.56
  -2   1  -1  516.61   42.79
  -2  -1   1  455.91   25.52
  -2  -1   1  499.19   42.02
   2   1   1  574.17   28.06
  -2   1  -2  327.32   33.05
  -2  -1   2  313.00   32.04
  -2  -1   3 1466.52   86.02
  -2   1  -3 1562.54   85.54
  -2  -1   4  161.39   22.88
  -2   1  -4  204.60   26.04
  -2  -1   5    4.57    4.05
  -2   1  -5   -2.66    5.69
  -2   1  -6  286.78   30.97
   2   1   6  306.76   44.99
  -2   1  -7  100.49   17.46
   2   1   7  107.85   26.04
  -2   1  -8  622.19   46.61
   2   1   8  751.38   73.80
   2   1   9  334.44   52.06
  -2   1  -9  341.78   33.82
   2   1  10   71.72   21.92
   2   1  11    2.93    3.50
   2   1  12    7.29    7.59
   2   1  13   36.75   16.23
   2   1  14   -3.97    8.24
   2   1  15  339.23   68.82
   2   1  16    0.58   12.08
   2  -2  16   40.95   27.06
   2  -2  15   -1.76    7.81
   2  -2  14  110.84   34.07
   2  -2  13  160.83   43.82
   2  -2  12  115.93   34.06
   2  -2  11  281.19   50.73
   2  -2  10  233.86   43.26
  -2   2  10  244.91   25.85
   2  -2   9   35.08   12.65
  -2   2   9   37.77   10.47
  -2   2   8  265.35   29.89
   2  -2   8  380.11   50.82
   2  -2   7  852.22   78.47
  -2   2   7  775.05   57.25
  -2   2   6   90.17   16.58
   2  -2   6  146.86   31.10
  -2   2   5  148.87   23.40
  -2   2   4 1513.58   86.33
  -2   2   3   64.76   13.52
  -2   2   2 2914.14  119.44
   2  -2   2 1849.12   98.61
  -2   2   1  865.87   59.14
  -2   2   1  875.67   41.14
  -2   2   0  337.90   35.94
  -2   2   0  303.10   21.90
   2   2   0  401.49   27.06
   2  -2   0  268.07   24.31
  -2  -2   0  296.98   20.88
  -2   2  -1  696.64   55.24
  -2  -2   1  681.16   38.26
   2   2   1  877.56   46.35
  -2   2  -2 2853.94  135.29
  -2  -2   2 2783.93  115.73
  -2   2  -3   60.75   10.08
  -2   2  -4 1695.54   94.15
  -2   2  -5  143.05   23.00
  -2   2  -6  108.63   19.33
   2   2   6  107.13   23.80
   2   2   7  868.22   81.51
  -2   2  -7  817.90   59.98
  -2   2  -8  321.89   34.23
   2   2   8  311.01   47.89
  -2   2  -9   40.12   11.23
   2   2   9   56.71   22.40
  -2   2 -10  238.07   27.59
   2   2  10  251.02   45.38
   2   2  11  272.11   48.88
   2   2  12  127.85   36.17
   2   2  13  202.94   46.63
   2   2  14   94.92   32.90
   2   2  15  -25.41   18.71
   2   2  16   23.80   18.66
   2  -3  16   13.61   13.83
   2  -3  15   20.42   16.84
   2  -3  14   42.61   21.93
   2  -3  13    5.15   11.86
   2  -3  12   74.21   24.51
   2  -3  11  150.53   36.79
  -2   3  10   29.01    7.90
   2  -3  10   25.16   11.27
  -2   3   9   81.83   16.76
   2  -3   9   41.25   10.98
  -2   3   8  164.38   24.82
   2  -3   8  203.80   37.26
  -2   3   7   66.61   15.51
   2  -3   7   69.38   21.09
  -2   3   6   91.20   18.24
   2  -3   6  104.05   26.88
  -2   3   5 2792.37  137.58
  -2   3   4  730.80   57.81
  -2   3   2  203.34   21.47
   2  -3   1  711.34   50.59
  -2   3   1 1185.34   55.70
   2   3   0   44.95    9.87
   2  -3   0   34.72    9.52
  -2  -3   0   63.92   11.06
  -2   3   0   72.33   12.41
  -2  -3   1 1148.82   59.42
   2   3   1 1311.13   68.24
   2   3   2  164.91   21.17
  -2   3  -4  714.07   57.82
  -2   3  -5 3210.83  152.30
  -2   3  -6  101.57   18.06
   2   3   6  110.72   29.54
  -2   3  -7   90.78   20.31
   2   3   7   97.37   25.23
  -2   3  -8  205.05   27.82
   2   3   8  180.56   35.66
   2   3   9   81.90   23.72
  -2   3  -9   83.23   16.28
  -2   3 -10   48.41   13.35
   2   3  10   26.92    8.99
   2   3  11  154.71   38.30
   2   3  12   45.03   21.01
   2   3  13   10.74   10.26
   2   3  14   18.61    9.90
   2   3  15   18.28   18.57
   2   3  16    0.01    4.18
   2  -4  16   15.95   15.73
   2  -4  15  -26.84   18.86
   2  -4  14  129.84   41.27
   2  -4  13   17.19   18.65
   2  -4  12   84.25   28.48
   2  -4  11  158.50   38.99
  -2   4  10  613.31   50.43
   2  -4  10  521.53   68.71
   2  -4   9  335.85   52.01
  -2   4   9  338.12   38.55
  -2   4   8  210.44   30.59
   2  -4   8  181.54   36.82
   2  -4   7  118.79   27.30
  -2   4   7   91.30   20.29
   2  -4   6  663.40   66.95
  -2   4   3   60.84   14.63
  -2   4   2  399.38   36.63
   2   4  -1  236.33   31.52
  -2   4   1  209.36   23.58
  -2   4   0 1170.13   69.38
   2   4   0 1340.09   78.66
  -2   4  -1  247.57   28.92
   2   4   1  222.58   27.63
   2   4   2  385.53   38.42
   2   4   3   76.26   17.56
   2   4   6  627.48   66.20
  -2   4  -7  106.31   22.19
   2   4   7  114.55   26.63
   2   4   8  191.95   37.54
  -2   4  -8  243.37   32.98
  -2   4  -9  370.22   41.90
   2   4   9  283.21   47.94
  -2   4 -10  634.60   54.65
   2   4  10  563.08   71.22
   2   4  11  165.33   39.69
   2   4  12   78.84   28.58
   2   4  13    6.19   11.46
   2   4  14  137.08   43.23
   2   4  15    0.01    9.84
   2   4  16   38.54   23.69
   2  -5  16  -10.77    9.67
   2  -5  15   46.82   27.81
   2  -5  14    1.08    4.38
   2  -5  13   13.52   16.22
   2  -5  12   43.82   21.28
   2  -5  11  501.00   70.92
  -2   5  10  450.62   47.28
   2  -5  10  398.33   59.39
  -2   5   9  319.51   41.47
   2  -5   9  270.48   46.42
   2  -5   8   -1.94    9.10
   2  -5   7  200.86   35.16
   2  -5   6   31.66   15.11
   2  -5   5  330.99   43.98
  -2   5   4 1488.37   92.75
  -2   5   3  998.92   69.12
  -2   5   2  814.17   62.80
   2   5  -1  251.41   35.53
  -2   5   1  214.68   28.30
  -2   5   0  201.06   29.17
   2   5   0  222.85   31.65
   2   5   1  207.41   28.17
  -2   5  -1  221.85   31.33
   2   5   2 1001.18   76.93
   2   5   3 1100.96   76.95
   2   5   4 1639.34  104.20
   2   5   6   17.34    9.64
   2   5   7  194.48   35.41
   2   5   8   -2.09    5.83
  -2   5  -9  396.25   46.61
   2   5   9  272.98   46.73
  -2   5 -10  484.74   49.59
   2   5  10  329.93   55.79
   2   5  11  471.50   69.24
   2   5  12   46.27   19.04
   2   5  13  -13.52   14.46
   2   5  14   14.68   10.56
   2   5  15   22.21   17.55
   2   5  16  -15.87   15.17
   2  -6  15  -42.97   23.39
   2  -6  14   21.55   13.14
   2  -6  13    7.69    8.48
   2  -6  12  130.77   40.02
   2  -6  11   36.92   22.90
   2  -6  10   78.82   27.52
  -2   6  10   83.35   19.57
   2  -6   9   67.32   22.98
   2  -6   8   66.90   22.14
   2  -6   7  217.66   37.05
   2  -6   6   61.67   17.49
  -2   6   5  941.50   77.21
   2  -6   5 1175.46   87.98
  -2   6   4 1012.52   76.60
  -2   6   3 1606.95  102.98
  -2   6   2 2448.34  130.18
   2   6  -1  704.55   66.38
  -2   6   1  457.88   45.84
  -2   6   0   -7.63    8.36
   2   6   0   -1.57    0.88
  -2   6  -1  546.82   52.41
   2   6   1  593.65   57.30
   2   6   2 2840.56  152.51
   2   6   3 1835.38  118.87
   2   6   4 1024.60   81.07
   2   6   5 1050.83   84.19
   2   6   5 1055.43   83.53
   2   6   6   60.62   18.14
   2   6   7  203.58   36.66
   2   6   8   55.79   21.29
   2   6   9   54.66   19.40
   2   6  10   67.11   24.73
  -2   6 -10  109.87   23.63
   2   6  11   37.22   17.02
   2   6  12  112.39   35.19
   2   6  13    9.44   13.87
   2   6  14   11.60   15.05
   2   6  15   -1.15    3.98
   2  -7  15   30.33   21.09
   2  -7  14  -20.13   13.83
   2  -7  13   19.02   14.57
   2  -7  12  148.03   39.44
   2  -7  11   25.20   18.61
   2  -7  10   39.56   18.00
   2  -7   9   15.30   13.13
   2  -7   8   12.03   13.42
   2  -7   7  243.13   39.82
  -2   7   7  240.53   42.54
  -2   7   6  409.83   52.11
   2  -7   6  469.88   51.58
   2  -7   5  696.74   62.24
  -2   7   5  561.37   59.77
  -2   7   4  118.12   25.50
   2  -7   4  170.05   27.30
  -2   7   3  596.73   61.36
  -2   7   2   19.55    6.21
   2   7  -1  702.33   69.76
  -2   7   1  525.80   54.60
  -2   7   0   -9.21    7.58
   2   7   0    4.21   11.37
   2   7   1  616.62   62.19
  -2   7  -1  608.88   60.28
   2   7   2   21.88    8.60
   2   7   3  678.37   71.86
   2   7   4  155.86   33.45
   2   7   5  665.04   64.55
   2   7   5  620.95   66.81
   2   7   6  414.14   53.83
   2   7   6  409.31   48.88
   2   7   7  271.06   47.81
   2   7   7  277.64   45.15
   2   7   8   13.58    9.42
   2   7   9   15.17   12.18
   2   7  10   41.87   22.15
   2   7  11    6.22   10.96
   2   7  12  131.21   38.72
   2   7  13   16.07   17.10
   2   7  14    4.68    7.81
   2   7  15   36.89   22.47
   2  -8  14   13.91    6.30
   2  -8  13  -37.02   24.84
   2  -8  12   -3.71   10.45
   2  -8  11   21.55   13.66
   2  -8  10   46.67   21.49
  -2   8   9   31.19   16.99
   2  -8   9   62.18   22.75
  -2   8   8   33.31   16.36
   2  -8   8   64.99   19.68
   2  -8   7  640.12   62.32
  -2   8   7  532.39   65.41
   2  -8   6  480.12   52.68
  -2   8   6  439.31   58.28
   2  -8   5   60.48   16.10
  -2   8   5   82.07   23.51
  -2   8   4  273.61   44.10
   2  -8   4  283.91   35.95
  -2   8   3  124.41   26.65
  -2   8   2  181.81   31.50
   2   8  -2  297.20   48.65
   2   8  -1   37.49   15.43
  -2   8   1   22.59   14.10
  -2   8   0    1.18    5.14
   2   8   0   -4.60    4.58
  -2   8  -1   13.38    4.59
   2   8   1   16.46    9.05
  -2   8  -2  235.85   39.55
   2   8   2  201.95   37.36
   2   8   3  131.01   28.94
   2   8   4  266.05   37.51
   2   8   4  257.03   45.66
   2   8   5   62.41   17.87
   2   8   5   34.89   14.30
   2   8   6  505.19   59.40
   2   8   6  480.58   62.52
   2   8   7  596.36   71.04
   2   8   7  640.65   67.19
   2   8   8   54.12   20.87
   2   8   8   46.97   19.98
   2   8   9   49.02   21.02
   2   8   9   44.86   21.65
   2   8  10   47.50   21.10
   2   8  11   14.06   13.21
   2   8  12    2.41    6.73
   2   8  13    1.71    9.26
   2   8  14   -9.28   10.93
   2  -9  14    5.93    5.99
   2  -9  13    6.94    7.74
   2  -9  12   11.63    0.88
  -2   9  12   11.28   14.16
   2  -9  11   75.21   26.47
  -2   9  11   61.22   26.33
   2  -9  10   21.09    1.28
  -2   9  10   23.75   13.54
  -2   9   9   29.27   17.51
   2  -9   9   71.64   23.27
  -2   9   8   -0.07    7.08
   2  -9   8   20.48   15.05
   2  -9   7  558.41   58.78
  -2   9   7  520.98   66.72
   2  -9   6  466.76   50.17
  -2   9   6  438.72   62.17
   2  -9   5  365.68   42.28
  -2   9   5  356.83   56.38
   2  -9   4  117.67   22.11
  -2   9   4  119.73   28.96
  -2   9   3   48.25   17.76
   2  -9   3   57.43   15.32
   2   9  -2   22.94   14.08
  -2   9   2   32.28   12.34
  -2   9   1   22.84   14.78
   2   9  -1  -12.23   15.86
  -2   9   0  675.71   71.63
   2   9   0  729.90   81.83
  -2   9  -1   15.73   13.71
   2   9   1   -9.43   12.10
  -2   9  -2   23.33   16.36
   2   9   2   15.79   11.29
   2   9   3   59.63   21.68
   2   9   3   47.93   11.71
   2   9   4  130.02   33.29
   2   9   4   89.37   19.63
   2   9   5  481.11   51.92
   2   9   5  399.55   63.60
   2   9   6  438.02   63.76
   2   9   6  500.38   54.87
   2   9   7  628.76   65.45
   2   9   7  524.73   70.15
   2   9   8   10.66    6.49
   2   9   8    6.13    6.03
   2   9   9   46.61   21.20
   2   9   9   34.32   17.80
   2   9  10   65.04   24.15
   2   9  10   36.29   20.23
   2   9  11   54.29   19.79
   2   9  11   82.36   30.54
   2   9  12    3.06   11.53
   2   9  12    7.29   12.29
   2   9  13  -58.78   26.56
   2   9  14  -25.04   18.05
  -2  10  13   15.66   20.17
  -2  10  12   -2.49    6.41
   2 -10  11   50.61   20.45
  -2  10  11   41.08   21.96
  -2  10  10   -2.99    7.04
   2 -10  10    3.62    4.52
   2 -10   9  145.83   32.05
  -2  10   9   86.88   29.14
  -2  10   8   -1.60    5.58
   2 -10   8   30.06   14.46
  -2  10   7    2.46    4.96
   2 -10   7   33.96   13.21
   2 -10   6    7.21    7.78
  -2  10   6   14.13   16.08
  -2  10   5  146.14   37.37
   2 -10   5  194.82   28.62
  -2  10   4   62.30   23.84
   2 -10   4   62.78   14.25
  -2  10   3  134.32   33.86
   2 -10   3  150.00   21.65
   2  10  -2   59.78   23.68
   2 -10   2   73.60   15.01
  -2  10   2   43.90   19.54
  -2  10   1  217.10   42.88
   2  10  -1  258.12   52.22
   2  10   0   18.98    4.60
  -2  10   0    6.99    5.98
  -2  10  -1  174.39   37.61
   2  10   1  251.09   51.58
  -2  10  -2   61.29   21.72
   2  10   2   58.42   22.91
   2  10   2   72.92   15.74
   2  10   3  121.13   32.16
   2  10   3  156.30   24.59
   2  10   4   67.17   17.88
   2  10   4   69.58   25.25
   2  10   5  184.49   29.02
   2  10   5  183.15   40.75
   2  10   6    6.96    5.85
   2  10   6   36.79   18.19
   2  10   7   47.13   20.19
   2  10   7   44.19   16.43
   2  10   8   15.39   11.14
   2  10   8   13.97   11.72
   2  10   9  133.31   32.41
   2  10   9   98.71   31.01
   2  10  10    0.20   12.36
   2  10  10    2.28    6.07
   2  10  11   44.65   20.78
   2  10  11   29.22   19.14
   2  10  12    0.24    1.68
   2  10  13   -6.31    8.91
  -2  11  12   86.78   33.03
  -2  11  11   -2.79    8.53
  -2  11  10   14.03   12.61
  -2  11   9  114.13   35.91
  -2  11   8   41.41   18.79
  -2  11   7   76.54   28.47
  -2  11   6   63.08   25.48
  -2  11   5    7.76    2.37
  -2  11   4  126.35   34.59
  -2  11   3  292.75   52.03
   2  11  -2  108.88   36.60
  -2  11   2   58.50   24.32
  -2  11   1   35.29   20.19
   2  11  -1   14.57   13.37
   2  11   0  312.46   59.08
  -2  11   0  248.62   50.49
   2  11   1   42.94   20.63
  -2  11  -1   46.29   24.74
  -2  11  -2   59.52   24.70
   2  11   2   54.83   22.86
   2  11   3  387.57   63.06
   2  11   4  108.80   32.03
   2  11   5   30.00   16.32
   2  11   6   47.91   22.61
   2  11   7  104.12   36.53
   2  11   8   68.53   27.26
   2  11   9  114.57   37.47
   2  11  10   10.29   13.35
   2  11  11   -0.31    1.93
   2  11  12   40.62   22.25
  -2  12  11   14.20   15.15
  -2  12  10   74.31   30.42
  -2  12   9   54.13   26.64
  -2  12   8   24.08   20.36
  -2  12   7   27.33   17.27
  -2  12   6   97.86   29.34
  -2  12   5   23.45   15.06
  -2  12   4  176.59   42.48
  -2  12   3   56.89   24.77
  -2  12   2  -25.65   19.54
  -2  12   1  116.14   36.45
   2  12  -1  181.74   47.38
   2  12   0    8.90    5.47
  -2  12   0   13.58    8.30
   2  12   1  180.01   46.09
  -2  12  -1  147.49   39.63
   2  12   2   12.12    8.71
   2  12   3   72.23   27.86
   2  12   4  227.11   48.91
   2  12   5    7.47    7.85
   2  12   6  127.53   37.91
   2  12   7   18.88   15.47
   2  12   8   25.92   23.04
   2  12   9   40.66   24.08
   2  12  10   30.32   23.84
   2  12  11   -8.29   10.55
  -2  13  10   46.22   29.02
  -2  13   9   69.91   28.25
  -2  13   8   25.93   16.32
  -2  13   7    5.52    4.53
  -2  13   6   -0.73    4.53
  -2  13   5   26.19   15.76
  -2  13   4   29.27   22.06
  -2  13   3    8.29    8.13
  -2  13   2    5.68    0.34
   2  13  -1  140.77   46.31
  -2  13   1   76.34   27.38
   2  13   0   51.48   26.44
  -2  13   0   41.41   23.42
  -2  13  -1  104.57   35.19
   2  13   1  104.38   35.87
   2  13   2    8.47   13.33
   2  13   3   -3.30    8.04
   2  13   4    8.99   14.05
   2  13   5   57.34   26.34
   2  13   6   21.64   18.23
   2  13   7   27.87   21.31
   2  13   8   23.78   21.64
   2  13   9   40.57   27.68
   2  13  10   33.83   27.22
  -2  14   8    2.52    4.46
  -2  14   7  -19.12   17.27
  -2  14   6    1.72   10.24
  -2  14   5   23.65   17.78
  -2  14   4   14.83   13.85
  -2  14   3   25.87   16.32
  -2  14   2   -7.69   12.41
   2  14  -1   11.86   15.68
  -2  14   1   26.55   19.85
  -2  14   0   73.17   30.39
   2  14   0   58.92   31.50
  -2  14  -1   29.81   21.18
   2  14   1    9.17   13.13
   2  14   2   25.24   18.57
   2  14   3    0.45    2.98
   2  14   4   13.28   12.09
   2  14   5   11.95   17.52
   2  14   6    8.82   10.69
   2  14   7    2.45    8.14
   2  14   8   18.02   15.85
  -2  15   6   -6.42    5.07
  -2  15   5    0.01    3.57
  -2  15   4  106.69   38.76
  -2  15   3    4.15    6.01
  -2  15   2   74.79   30.11
   2  15  -1    5.05   15.95
  -2  15   1   18.44   15.02
  -2  15   0  -23.98   16.31
   2  15   0   21.48   24.81
  -2  15  -1    7.82   15.14
   2  15   1   17.40   24.86
   2  15   2   65.85   37.32
   2  15   3    0.01    4.54
   2  15   4   52.80   33.66
   2  15   5  -28.05   20.36
   2  15   6   19.21   16.85
  -2  16   3   -3.61   14.24
  -2  16   2   18.17   17.25
  -2  16   1   -1.37    4.61
   2  16   0   57.93   38.35
  -2  16   0   32.95   24.04
   2  16   1   22.53   20.37
   2  16   2  -42.46   26.89
   2  16   3    0.01    6.39
  -3   0   0   -8.66    9.84
  -3   0  -1   32.48    5.57
  -3   0   1   44.32   13.61
  -3   0  -2  115.05   19.56
  -3   0   2  110.13   20.77
  -3   0  -3    7.36    4.15
  -3   0   3   -4.43    6.08
  -3   0  -4   75.03   18.10
  -3   0   4   31.27   10.21
  -3   0  -5  107.42   21.09
  -3   0   5   97.44   19.59
  -3   0  -6    1.71    4.45
  -3   0   6   12.89    6.77
  -3   0  -7  136.34   23.08
  -3   0   7  113.67   22.87
  -3   0  -8  557.93   52.06
  -3   0   8  442.43   45.52
   3   0   8  606.07   77.08
   3   0   9   78.98   27.99
  -3   0  -9   51.07   16.91
   3   0  10  -14.26   15.49
   3   0  11    2.97   16.26
   3   0  12   21.80   18.85
   3   0  13   -3.93   11.41
   3   0  14   -3.86   18.01
   3   0  15    6.98   10.22
   3   0  16   21.76   25.43
   3  -1  16   21.82   19.85
   3  -1  15   17.44   19.44
   3  -1  14   34.58   19.02
   3  -1  13   13.49   10.88
   3  -1  12    1.98    0.06
   3  -1  11  103.99   32.40
   3  -1  10  212.89   45.49
  -3   1  10  231.47   30.22
   3  -1   9  113.15   32.45
  -3   1   9   80.34   18.45
  -3   1   8  288.79   34.67
   3  -1   8  485.61   68.94
  -3   1   7   26.39   11.06
  -3   1   6  375.39   41.88
  -3  -1  -6  528.13   49.91
  -3   1   5  768.17   63.73
  -3  -1  -5  868.24   68.87
  -3   1   4   67.50   17.17
  -3  -1  -4   62.80   16.36
  -3  -1  -3   76.43   17.33
  -3   1   3   83.62   17.17
  -3   1   2 2015.34   74.91
  -3   1   2 1852.91  107.37
  -3  -1  -2 1879.80  105.15
  -3   1   1  786.58   61.72
  -3  -1  -1  606.07   55.66
  -3   1   0 1069.87   76.57
  -3  -1   0 1001.65   70.20
  -3   1  -1  732.87   60.90
  -3  -1   1  684.81   58.27
  -3   1  -2 1984.70  114.88
  -3  -1   2 1819.65  110.07
  -3  -1   2 2144.59   85.26
  -3   1  -3   91.19   21.03
  -3  -1   3   67.56   17.64
  -3   1  -4   88.27   19.99
  -3  -1   4   61.95   15.83
  -3   1  -5  862.33   66.07
  -3  -1   5  794.74   65.94
  -3   1  -6  456.31   45.45
  -3  -1   6  424.47   45.48
  -3   1  -7   28.20   11.66
  -3   1  -8  380.78   39.05
   3   1   8  437.65   64.71
  -3   1  -9   90.63   20.07
   3   1   9   98.27   29.95
  -3   1 -10  227.47   31.34
   3   1  10  183.57   43.84
   3   1  11   98.16   30.80
   3   1  12   13.72   12.88
   3   1  13   28.40   15.11
   3   1  14   62.96   28.01
   3   1  15   35.44   23.97
   3   1  16   46.98   28.00
   3  -2  15   23.03   22.47
   3  -2  14   81.66   30.24
   3  -2  13  121.06   40.79
   3  -2  12   71.09   28.45
   3  -2  11  356.37   62.98
   3  -2  10   53.20   21.74
  -3   2  10   54.44   13.93
  -3   2   9   45.60   12.97
   3  -2   9   79.35   27.65
  -3   2   8  121.73   23.26
   3  -2   8  156.02   39.30
  -3   2   7   33.13   12.03
  -3   2   6   92.41   20.70
  -3   2   5   48.49   15.21
  -3   2   4  586.70   55.68
  -3   2   3  158.49   26.36
  -3  -2  -3  183.48   29.82
  -3   2   2 1571.95  100.50
  -3  -2  -2 1679.35  102.92
   3  -2   2 1643.28   84.96
  -3   2   2 1629.97   74.10
  -3   2   1 1405.47   87.88
  -3  -2  -1 1392.85   87.78
  -3   2   1 1392.93   56.26
  -3   2   0    7.43    6.31
  -3  -2   0    3.83    9.04
  -3   2  -1 1375.09   91.34
  -3  -2   1 1476.45   92.35
   3   2   1 1626.25   67.87
  -3  -2   1 1335.17   61.59
  -3   2  -2 1651.91  101.97
  -3  -2   2 1562.14  100.62
  -3  -2   2 1599.09   73.52
   3   2   2 1834.25   80.84
  -3   2  -3  196.91   31.49
  -3   2  -4  592.84   55.19
  -3   2  -5   74.52   18.79
  -3   2  -6  131.26   25.62
  -3   2  -7   50.08   14.72
  -3   2  -8  139.76   24.65
   3   2   8  128.26   34.03
  -3   2  -9   57.42   15.52
   3   2   9   56.78   24.01
   3   2  10   62.71   24.03
  -3   2 -10   49.93   11.53
   3   2  11  338.44   61.68
   3   2  12   52.31   21.22
   3   2  13  135.98   40.11
   3   2  14   64.80   31.55
   3   2  15   19.80   17.90
   3  -3  15   23.68   13.13
   3  -3  14   13.38    4.59
   3  -3  13   48.06   22.06
   3  -3  12  224.19   50.36
   3  -3  11  151.01   40.88
  -3   3  10  111.06   20.20
   3  -3  10  173.38   43.13
  -3   3   9   51.19   15.12
   3  -3   9   78.07   31.53
  -3   3   8   59.75   16.40
   3  -3   8   78.65   26.42
  -3   3   7   44.88   14.08
  -3   3   6   31.88   12.86
  -3   3   5   -3.37    3.67
  -3   3   4  166.67   28.90
  -3   3   3  201.13   32.03
  -3   3   3  180.72   22.02
  -3   3   2  565.16   57.07
   3  -3   2  677.93   50.24
  -3   3   2  615.00   43.37
  -3   3   1  938.36   74.63
  -3   3   1  849.81   50.97
   3  -3   1 1137.26   66.35
   3  -3   0 2389.62  126.31
  -3   3   0 2852.42  154.85
  -3   3   0 3059.07  122.94
  -3   3  -1  964.72   76.76
   3   3   1  940.09   59.32
  -3  -3   1  936.30   52.27
  -3   3  -2  626.95   57.40
  -3  -3   2  546.70   37.27
   3   3   2  664.77   52.36
   3   3   3  199.88   28.77
  -3   3  -3  206.05   30.86
  -3   3  -4  178.14   30.69
  -3   3  -5    8.98    6.73
  -3   3  -6   42.46   13.81
  -3   3  -7   44.25   12.18
  -3   3  -8   96.21   25.21
   3   3   8   90.59   30.74
  -3   3  -9   59.34   17.61
   3   3   9  115.18   34.56
   3   3  10  120.99   35.06
  -3   3 -10  139.23   26.10
   3   3  11  179.98   44.88
   3   3  12  208.62   48.02
   3   3  13   49.32   22.19
   3   3  14   15.51    8.55
   3   3  15    6.39    9.91
   3  -4  15   36.73   23.93
   3  -4  14   10.01    6.34
   3  -4  13    4.08   13.74
   3  -4  12    7.19    8.28
   3  -4  11   66.00   26.33
  -3   4  10   96.20   22.40
   3  -4  10  107.43   32.58
  -3   4   9  112.14   24.17
   3  -4   9  139.84   35.14
  -3   4   8   26.70   10.80
   3  -4   8   26.73   15.75
  -3   4   7   15.99   11.14
  -3   4   6   23.82   12.39
  -3   4   5   61.33   18.41
  -3   4   4  791.27   58.15
  -3   4   4  815.78   72.79
  -3   4   3  128.12   21.49
  -3   4   3  116.69   24.60
  -3   4   2  211.53   34.84
  -3   4   2  200.28   24.38
  -3   4   1  504.61   54.43
  -3   4   1  489.42   39.47
  -3   4   0 1203.92   91.14
   3   4   0 1382.90   89.44
  -3   4   0 1190.64   70.34
  -3   4  -1  488.19   54.45
   3   4   1  523.29   48.76
  -3   4  -2  235.06   35.94
   3   4   2  204.01   31.98
  -3   4  -3  149.96   29.81
   3   4   3  121.27   24.93
   3   4   4  889.00   68.06
  -3   4  -4  900.52   76.80
  -3   4  -5   90.37   23.53
  -3   4  -6   29.87   10.57
  -3   4  -7   25.54   14.06
  -3   4  -8   46.60   19.77
   3   4   8   59.53   25.27
  -3   4  -9  136.48   26.28
   3   4   9  124.78   34.77
  -3   4 -10  133.35   26.68
   3   4  10  127.34   36.13
   3   4  11   74.48   26.66
   3   4  12   28.93   17.35
   3   4  13    9.52   13.48
   3   4  14   14.60   16.99
   3   4  15   20.99   18.15
   3  -5  15    0.01    7.43
   3  -5  14   17.76   24.11
   3  -5  13    2.01    5.09
   3  -5  12    0.64    7.35
   3  -5  11   16.99   10.83
  -3   5  10   91.61   22.61
   3  -5  10   95.76   31.06
  -3   5   9   45.34   15.58
   3  -5   9   43.97   19.47
  -3   5   8  389.08   49.77
   3  -5   8  500.39   69.59
  -3   5   7  232.04   38.20
   3  -5   7  346.63   55.20
  -3   5   6   28.73   12.89
  -3   5   5  215.36   34.52
  -3   5   5  176.99   28.70
  -3   5   4   -9.11   10.03
  -3   5   4   -3.58    6.21
  -3   5   3  251.31   36.92
  -3   5   3  306.68   36.56
  -3   5   2   18.54    6.56
  -3   5   1  143.17   21.25
   3   5   0   15.08    7.88
  -3   5   0   16.03    6.58
   3   5   1  138.61   26.45
   3   5   2   12.49    7.43
  -3   5  -3  244.38   38.63
   3   5   3  318.60   40.52
  -3   5  -4   -3.93    5.77
   3   5   4    4.39    6.14
   3   5   5  203.82   33.47
  -3   5  -5  190.01   34.81
  -3   5  -6   31.17   10.90
  -3   5  -7  306.91   45.66
   3   5   7  355.33   56.58
  -3   5  -8  475.05   56.81
   3   5   8  504.03   70.86
  -3   5  -9   59.31   19.19
   3   5   9   72.37   29.31
  -3   5 -10  100.89   23.58
   3   5  10   76.46   25.16
   3   5  11   10.38    7.87
   3   5  12    5.43    9.21
   3   5  13    6.19    6.50
   3   5  14    7.26   10.20
   3   5  15    4.87    8.79
   3  -6  14  -14.22   15.60
   3  -6  13   22.16   17.39
   3  -6  12   36.58   21.36
   3  -6  11   48.92   24.62
  -3   6  10   94.92   23.10
   3  -6  10   93.30   30.62
  -3   6   9  396.61   51.16
   3  -6   9  429.20   65.82
  -3   6   8   75.33   19.88
   3  -6   8  114.96   31.91
  -3   6   7   30.24   14.09
  -3   6   7   10.40    8.86
   3  -6   7   26.07   15.39
  -3   6   6  282.06   38.48
  -3   6   6  267.74   42.96
  -3   6   5  232.88   33.81
  -3   6   4   23.64   10.08
  -3   6   3  174.10   27.04
  -3   6   2  131.09   22.08
   3   6  -1  101.52   25.91
  -3   6   1  103.08   20.45
  -3   6   0 1205.12   80.69
   3   6   0 1507.80  101.48
  -3   6  -1   83.06   17.48
   3   6   1  102.37   24.41
   3   6   2  126.04   25.50
   3   6   3  206.75   35.23
   3   6   4   20.16    9.32
   3   6   5  230.91   36.65
   3   6   6  308.18   44.94
  -3   6  -6  334.22   47.55
  -3   6  -7   17.15    4.15
   3   6   7   12.11   11.43
  -3   6  -8  100.92   25.66
   3   6   8   87.23   30.99
  -3   6  -9  469.83   57.85
   3   6   9  406.12   63.68
  -3   6 -10  107.81   25.58
   3   6  10   88.08   30.00
   3   6  11   47.85   22.27
   3   6  12   28.49   17.82
   3   6  13    2.15    8.57
   3   6  14  -11.29   12.84
   3  -7  14   -8.48   11.79
   3  -7  13  -11.71   17.61
   3  -7  12   28.53   14.80
   3  -7  11   41.29   20.09
  -3   7  10   16.54   10.28
   3  -7  10  -18.69   17.69
  -3   7   9  349.12   51.07
   3  -7   9  384.06   64.11
  -3   7   8  481.20   60.78
  -3   7   8  513.67   61.93
   3  -7   8  568.19   72.48
  -3   7   7   60.82   18.64
   3  -7   7   91.59   27.39
   3  -7   6  483.87   62.25
  -3   7   6  404.29   50.51
  -3   7   5  745.27   70.22
  -3   7   4   65.16   19.12
  -3   7   3    5.00    2.02
  -3   7   2  575.11   53.89
   3   7  -1   26.65   13.54
  -3   7   1   23.99    8.95
  -3   7   0  452.46   47.79
   3   7   0  531.83   61.06
  -3   7  -1   16.96    3.18
   3   7   1   32.21   15.45
   3   7   2  651.50   66.57
   3   7   3   -0.89    6.33
   3   7   4   76.21   25.35
   3   7   5  801.13   80.47
   3   7   6  401.94   53.72
   3   7   7   94.07   29.39
   3   7   7   74.41   24.71
   3   7   8  538.77   69.03
  -3   7  -8  548.35   67.03
   3   7   8  525.63   72.63
  -3   7  -9  402.51   55.14
   3   7   9  310.68   56.06
  -3   7 -10    4.82    9.00
   3   7  10    0.05    6.69
   3   7  11   35.86   21.33
   3   7  12   29.08   23.71
   3   7  13   19.97   16.45
   3   7  14   25.24   27.88
   3  -8  13   -4.77    4.26
   3  -8  12  -23.28   19.31
  -3   8  11   -7.03   11.24
   3  -8  11    1.20   12.20
  -3   8  10    8.39    8.64
   3  -8  10    0.73    7.92
  -3   8  10   -5.66    7.92
   3  -8   9  111.32   30.90
  -3   8   9   97.65   23.18
  -3   8   9   89.61   26.12
  -3   8   8   79.45   23.74
   3  -8   8  154.51   37.97
   3  -8   7 1284.36  108.09
  -3   8   7  993.28   90.96
   3  -8   6  790.31   83.24
  -3   8   6  619.85   69.19
  -3   8   5  158.86   32.60
  -3   8   4   78.11   20.75
  -3   8   3   27.30   12.55
  -3   8   2  172.46   31.79
   3   8  -1  655.47   77.56
  -3   8   1  524.87   56.25
  -3   8   0  203.91   32.69
   3   8   0  220.14   42.83
  -3   8  -1  580.01   61.88
   3   8   1  600.57   71.32
   3   8   2  199.81   39.25
   3   8   3   51.97   20.29
   3   8   4   68.04   22.40
   3   8   5  117.44   30.25
   3   8   6  749.66   83.62
   3   8   6  675.65   78.54
   3   8   7 1209.04  108.50
   3   8   7  988.38   97.06
   3   8   8   75.77   25.74
   3   8   8   83.39   26.57
   3   8   9   93.65   29.72
  -3   8  -9  144.30   33.93
   3   8   9  110.21   32.88
   3   8  10   -0.12    4.08
  -3   8 -10   14.15    5.20
   3   8  10    7.15    8.71
   3   8  11    1.01    5.75
   3   8  12   12.98   15.50
   3   8  13  -29.34   20.11
   3  -9  13    3.13    4.13
  -3   9  13    2.41    2.15
   3  -9  12   25.34   20.43
  -3   9  12   11.70   16.41
   3  -9  11   28.27   18.49
  -3   9  11   30.05   16.28
  -3   9  10   43.74   17.02
   3  -9  10   81.22   29.20
  -3   9  10   16.77   11.38
   3  -9   9   60.00   24.21
  -3   9   9   29.98   15.85
  -3   9   8  267.29   47.10
   3  -9   8  417.97   59.08
  -3   9   7   18.35    7.06
   3  -9   7   28.47   15.64
   3  -9   6   87.37   22.68
  -3   9   6   81.81   23.61
  -3   9   5  131.79   30.83
   3  -9   5  193.50   36.46
  -3   9   4  503.58   58.85
  -3   9   3   41.66   16.42
  -3   9   2   -0.69    5.25
   3   9  -1  310.89   56.35
  -3   9   1  248.84   42.35
  -3   9   0  243.86   40.66
   3   9   0  334.85   57.39
  -3   9  -1  245.60   41.23
   3   9   1  263.21   48.45
   3   9   2   16.39   13.06
   3   9   3   52.21   18.84
   3   9   4  567.68   71.77
   3   9   5  197.55   43.71
   3   9   5  215.57   41.92
   3   9   6   82.01   25.14
   3   9   6  100.50   32.37
   3   9   7   43.38   18.93
   3   9   7   31.98   16.06
   3   9   8  301.30   53.47
   3   9   8  363.11   58.93
   3   9   9   42.22   19.34
   3   9   9   39.25   18.91
  -3   9 -10   63.58   23.08
   3   9  10   45.63   21.71
   3   9  10   26.69   18.86
   3   9  11   44.89   23.72
   3   9  11   19.13   17.70
   3   9  12  -12.38    6.94
   3   9  12   -0.01    6.72
   3   9  13   18.96   20.63
   3   9  13    6.00    6.04
  -3  10  12   20.15   14.78
  -3  10  11    1.50    3.62
   3 -10  10   -5.35    7.84
  -3  10  10   -0.01    2.13
   3 -10   9   -1.28    8.42
  -3  10   9    4.69    5.61
  -3  10   8   79.19   27.56
   3 -10   8  122.14   29.68
   3 -10   7   86.73   26.58
  -3  10   7   43.16   18.40
  -3  10   6  183.23   38.05
   3 -10   6  252.92   41.11
  -3  10   5   48.00   21.29
   3 -10   5   76.40   24.66
  -3  10   4  242.99   42.95
   3 -10   4  338.71   47.00
  -3  10   3   -2.74    7.36
  -3  10   2  251.68   46.16
   3  10  -1   80.42   29.81
  -3  10   1   72.73   22.45
   3  10   0  253.61   50.64
  -3  10   0  185.25   36.99
  -3  10  -1   53.89   20.36
   3  10   1   73.31   27.13
   3  10   2  323.01   58.22
   3  10   3   16.88   10.55
   3  10   4  274.87   49.88
   3  10   5   55.99   22.61
   3  10   5   72.00   22.56
   3  10   6  210.64   48.44
   3  10   6  269.14   44.02
   3  10   7   65.44   24.10
   3  10   7   61.91   27.11
   3  10   8   74.32   28.24
   3  10   8  144.28   34.07
   3  10   9   -2.74    5.47
   3  10   9   17.86   15.68
   3  10  10    7.97   10.66
   3  10  10    8.16   13.09
   3  10  11   14.20   12.75
   3  10  12    0.01   10.83
  -3  11  11    5.63    7.79
  -3  11  10   20.89   15.16
  -3  11   9   58.56   22.44
  -3  11   8    6.62    4.13
  -3  11   7  149.91   38.56
  -3  11   6   -8.94   10.43
  -3  11   5   24.91   11.99
  -3  11   4    1.62    7.92
  -3  11   3   -3.43    7.16
  -3  11   2  121.09   32.08
   3  11  -1    4.99   13.75
  -3  11   1    6.21   10.26
  -3  11   0   13.36   11.16
   3  11   0   13.38   12.98
  -3  11  -1    3.03    7.54
   3  11   1    5.82    8.69
   3  11   2  143.80   40.86
   3  11   3   10.51    1.85
   3  11   4    5.05    5.95
   3  11   5   54.85   25.50
   3  11   6   -0.60    8.41
   3  11   7  166.85   45.87
   3  11   8    6.85    8.08
   3  11   9   47.77   28.82
   3  11  10  -11.11   11.95
   3  11  11    0.01   15.12
  -3  12  10   -8.99   12.28
  -3  12   9    0.65    3.05
  -3  12   8   24.43   17.05
  -3  12   7    2.54    3.39
  -3  12   6   39.52   19.72
  -3  12   5   17.03   11.35
  -3  12   4    8.36   11.09
  -3  12   3   13.94   17.17
  -3  12   2   53.85   22.13
   3  12  -1  255.65   59.74
  -3  12   1  167.40   38.51
  -3  12   0    0.68    3.75
   3  12   0   -0.19    4.34
  -3  12  -1  171.93   40.58
   3  12   1  203.63   48.77
   3  12   2   53.16   26.34
   3  12   3   18.74   15.21
   3  12   4   -4.56    9.76
   3  12   5   31.25   22.53
   3  12   6   30.53   20.12
   3  12   7   15.12   15.43
   3  12   8   11.06   15.94
   3  12   9  -22.06   17.92
   3  12  10   18.34   16.43
  -3  13   8   -0.56    7.87
  -3  13   7    8.44    9.44
  -3  13   6    5.00    2.29
  -3  13   5   32.41   18.09
  -3  13   4   -1.23    9.06
  -3  13   3   56.11   25.09
  -3  13   2   43.53   22.53
   3  13  -1   31.99   22.14
  -3  13   1   42.92   21.56
  -3  13   0  161.29   44.71
   3  13   0  220.76   60.79
  -3  13  -1   65.54   27.97
   3  13   1   67.49   32.06
   3  13   2   27.00   18.35
   3  13   3   38.66   24.54
   3  13   4   13.42   13.65
   3  13   5   45.05   29.55
   3  13   6    8.89   10.56
   3  13   7    0.01   13.05
   3  13   8   17.25   19.06
  -3  14   7   22.84   16.49
  -3  14   6   12.19   12.78
  -3  14   5  -23.82   16.45
  -3  14   4   23.61   19.42
  -3  14   3   41.45   25.01
  -3  14   2    0.01    7.13
  -3  14   1   51.13   25.92
   3  14   0    0.01   15.33
  -3  14   0   -6.36    4.28
   3  14   1   29.60   21.70
   3  14   2  -28.75   20.79
   3  14   3   33.58   25.78
   3  14   4   -0.01    5.05
   3  14   5  -50.74   26.92
   3  14   6   -0.01    6.70
   3  14   7   -0.01    9.03
  -3  15   4   12.60   13.41
  -3  15   3   18.49   18.59
  -3  15   2   -5.49    9.95
  -3  15   1   -7.91   10.49
   3  15   0  -20.93   19.81
  -3  15   0  -36.07   23.65
   3  15   1    0.07    1.15
   3  15   2   23.75   30.63
   3  15   3    0.01   10.48
   3  15   4   29.28   22.11
  -4   0   0  293.89   39.79
  -4   0  -1   34.58   11.99
  -4   0   1   45.29   13.64
  -4   0  -2   49.56   14.95
  -4   0   2   28.58    8.44
  -4   0  -3   11.92    5.04
  -4   0   3    6.38    4.77
  -4   0  -4   73.55   17.49
  -4   0   4   70.98   18.54
  -4   0  -5    9.03    2.37
  -4   0   5    7.90    5.99
  -4   0  -6    9.68    6.88
  -4   0   6   10.81    7.94
  -4   0  -7  551.05   56.99
  -4   0   7  469.30   53.58
  -4   0  -8   39.16   16.13
  -4   0   8   28.02   11.98
  -4   0  -9   86.74   21.38
  -4   0   9   85.54   19.64
   4   0   9  118.49   37.30
   4   0  10  170.11   46.44
   4   0  11   -1.34   11.70
   4   0  12    2.40   11.12
   4   0  13   -9.39    5.99
   4   0  14   49.02   25.90
   4  -1  14   78.37   35.06
   4  -1  13    5.77   10.54
   4  -1  12   42.99   22.46
   4  -1  11   64.28   29.88
   4  -1  10   42.99   29.17
  -4   1  10   21.62   10.13
  -4   1   9  449.29   51.91
   4  -1   9  617.26   87.93
  -4   1   8  115.98   23.89
  -4   1   7   91.22   20.44
  -4  -1  -7  136.38   28.08
  -4   1   6   14.67    9.61
  -4  -1  -6   27.78   12.14
  -4   1   5   18.05    9.56
  -4  -1  -5   21.93   11.19
  -4   1   4  339.93   44.53
  -4  -1  -4  426.65   50.55
  -4   1   3  423.44   49.32
  -4  -1  -3  420.20   50.39
   4  -1   3  315.86   31.20
  -4   1   3  457.68   27.04
  -4   1   2  379.11   46.91
  -4  -1  -2  356.84   44.93
  -4   1   1   15.06    5.65
  -4  -1  -1   22.03    4.87
  -4  -1   0  284.91   41.81
  -4   1   0  302.62   43.16
  -4   1  -1   18.59   10.51
  -4  -1   1   26.43   12.92
  -4   1  -2  374.89   46.31
  -4  -1   2  318.18   42.82
   4   1   3  376.51   28.76
  -4   1  -3  441.93   50.35
  -4  -1   3  462.87   49.91
  -4  -1   3  216.20   19.23
  -4   1  -4  368.53   45.78
  -4  -1   4  337.14   46.06
  -4   1  -5   16.40   10.19
  -4  -1   5   25.53   11.70
  -4   1  -6   30.34   13.63
  -4  -1   6   26.25   10.85
  -4   1  -7  134.05   25.47
  -4  -1   7  106.74   24.38
  -4   1  -8  129.39   26.25
  -4   1  -9  511.19   55.15
   4   1   9  603.31   89.18
  -4   1 -10    5.40    6.56
   4   1  10   10.80    9.01
   4   1  11   73.36   31.83
   4   1  12   27.18   24.09
   4   1  13   16.74   16.07
   4   1  14   49.07   29.00
   4  -2  14   28.71   18.14
   4  -2  13  -10.99    2.60
   4  -2  12   92.78   33.80
   4  -2  11   97.20   31.65
  -4   2  10  116.73   24.85
   4  -2  10  164.72   46.29
  -4   2   9   36.68   10.10
   4  -2   9   53.11   27.57
  -4   2   8   76.57   20.18
  -4   2   7  302.76   41.33
  -4   2   6  217.51   36.46
  -4   2   5  329.50   45.06
  -4   2   4  108.23   17.41
  -4   2   4   83.84   22.50
  -4  -2  -4   80.75   21.14
  -4   2   3  164.26   30.61
  -4  -2  -3  141.63   29.65
   4  -2   3  207.72   26.78
  -4   2   3  202.85   19.66
  -4   2   2   62.67   17.10
   4  -2   2   44.63    9.59
  -4  -2  -2   70.51   21.00
  -4   2   2   97.98   10.21
  -4   2   1   69.32   20.22
  -4  -2  -1   53.52   13.55
  -4   2   0    5.13    6.78
  -4  -2   0   28.22   14.37
  -4   2  -1   52.06   19.72
  -4  -2   1   53.19   17.98
  -4   2  -2   75.78   20.27
   4   2   2   75.00   11.62
  -4  -2   2   69.63   19.76
  -4  -2   2   70.36    8.51
  -4   2  -3  190.22   33.11
  -4  -2   3  147.97   30.63
  -4  -2   3  115.20   14.54
   4   2   3  200.10   23.45
  -4   2  -4   90.99   21.85
  -4   2  -5  332.06   45.27
  -4   2  -6  249.31   39.77
  -4   2  -7  349.03   45.16
  -4   2  -8   95.60   23.25
  -4   2  -9   40.81   13.50
   4   2   9   73.32   32.00
  -4   2 -10  125.98   26.41
   4   2  10  147.32   42.80
   4   2  11   88.88   33.53
   4   2  12  112.80   39.92
   4   2  13   29.23   24.84
   4   2  14   37.81   23.87
   4  -3  14   65.83   29.28
   4  -3  13   20.70   17.42
   4  -3  12   23.62   17.34
   4  -3  11  134.27   40.50
  -4   3  10   14.82    6.45
   4  -3  10   21.90   18.22
  -4   3   9  101.67   23.77
   4  -3   9  142.60   41.13
  -4   3   8  190.17   34.36
  -4   3   7  121.06   26.92
  -4   3   6   93.04   24.49
  -4   3   5  592.77   50.27
  -4   3   5  558.21   63.02
  -4   3   4  251.88   40.04
  -4   3   4  265.53   28.17
  -4   3   3  342.96   47.09
  -4   3   3  399.86   33.15
  -4   3   2  239.44   38.27
  -4   3   2  305.40   24.86
   4  -3   2  358.63   36.09
  -4   3   1  140.49   30.37
  -4   3   1  164.04   16.72
  -4   3   0   44.09   17.02
  -4   3  -1  141.92   29.24
  -4   3  -2  279.81   41.14
   4   3   2  297.32   29.19
  -4  -3   2  172.71   18.39
  -4   3  -3  328.36   47.17
   4   3   3  523.72   46.23
  -4   3  -4  260.76   40.93
   4   3   4  255.05   31.03
  -4   3  -5  609.34   65.99
  -4   3  -6   97.62   24.57
  -4   3  -7  120.69   26.36
  -4   3  -8  209.54   35.24
  -4   3  -9  137.94   28.75
   4   3   9  125.71   38.60
  -4   3 -10   27.11   11.60
   4   3  10    5.81    1.99
   4   3  11  156.96   44.61
   4   3  12   19.98   14.67
   4   3  13   16.41   20.34
   4   3  14   64.66   35.28
   4  -4  14   29.69   22.93
   4  -4  13   10.57   17.50
   4  -4  12   15.50   13.86
   4  -4  11  139.43   41.72
  -4   4  10  317.91   45.65
   4  -4  10  436.54   75.93
  -4   4   9   27.77   13.39
   4  -4   9   35.76   22.25
  -4   4   8  152.07   30.30
  -4   4   7  243.52   41.82
  -4   4   6   59.37   18.49
  -4   4   6   77.83   18.13
  -4   4   5  466.04   56.68
  -4   4   5  506.65   46.19
  -4   4   4  126.83   21.75
  -4   4   4  105.92   26.89
  -4   4   3    7.30    2.30
  -4   4   3   23.46   14.80
  -4   4   2   26.44   13.67
  -4   4   2   13.42    5.34
  -4   4   1   20.37    6.71
  -4   4   1   18.16    1.19
  -4   4   0   38.05   17.60
  -4  -4   1   11.82    5.09
   4   4   1   23.80    7.99
  -4   4  -1   18.77   11.16
  -4   4  -2   16.81    8.43
   4   4   2   30.34   11.92
  -4   4  -3   -2.92    8.37
   4   4   3  -13.89   10.42
   4   4   4  105.82   21.57
  -4   4  -4  102.19   24.48
  -4   4  -5  514.52   62.28
   4   4   5  750.17   63.94
  -4   4  -6   65.59   19.87
  -4   4  -7  315.21   45.11
  -4   4  -8  155.21   31.70
  -4   4  -9   67.70   22.31
   4   4   9   27.34   15.74
  -4   4 -10  387.93   50.08
   4   4  10  434.89   76.42
   4   4  11  154.45   45.65
   4   4  12    3.68    6.97
   4   4  13    2.20   17.86
   4   4  14  -25.49   19.94
   4  -5  14    5.70    9.25
   4  -5  13   12.67   12.69
   4  -5  12   24.73   18.96
   4  -5  11   18.40   16.61
  -4   5  10   50.57   18.09
   4  -5  10   78.70   29.73
  -4   5   9  124.07   28.84
   4  -5   9  136.93   46.30
  -4   5   8  196.74   33.24
  -4   5   7  299.03   39.51
  -4   5   7  235.14   41.20
  -4   5   6    3.41    9.47
  -4   5   6   11.58    8.87
  -4   5   5   80.66   24.02
  -4   5   5  144.33   25.72
  -4   5   4   90.43   24.52
  -4   5   4  113.93   21.97
  -4   5   3  451.91   58.91
  -4   5   3  477.52   42.78
  -4   5   2  105.32   29.04
  -4   5   2  112.00   20.21
  -4   5   1  161.45   35.29
  -4   5   1  149.66   21.62
  -4   5   0  106.28   28.29
   4   5   1  200.99   30.78
  -4   5  -1  204.69   41.15
  -4   5  -2   95.68   27.45
   4   5   2  169.71   27.82
  -4   5  -3  509.04   62.31
   4   5   3  552.29   53.09
  -4   5  -4   87.98   24.05
   4   5   4  197.53   33.90
  -4   5  -5  130.75   30.13
   4   5   5  162.36   29.75
  -4   5  -6    9.40   11.01
   4   5   6   -3.55    5.25
   4   5   7  356.87   50.51
  -4   5  -7  289.05   46.54
  -4   5  -8  217.74   39.26
  -4   5  -9  130.18   31.28
   4   5   9  131.18   40.53
  -4   5 -10   61.06   19.05
   4   5  10   92.40   33.63
   4   5  11   22.44   18.81
   4   5  12   22.81   21.70
   4   5  13   66.13   31.05
   4   5  14   -7.59   10.94
   4  -6  13    9.06   14.33
   4  -6  12   17.01   15.45
   4  -6  11   33.19   11.71
  -4   6  10   32.81   17.38
   4  -6  10    9.14   11.26
  -4   6   9   24.33   13.59
   4  -6   9   25.84   20.10
  -4   6   9   35.11   14.69
  -4   6   8   60.04   18.92
  -4   6   8   65.93   21.73
   4  -6   8   44.64   22.09
  -4   6   7   45.67   12.33
  -4   6   7   27.43   11.39
  -4   6   6   32.21   17.13
  -4   6   6   31.58   12.39
  -4   6   5   66.75   24.28
  -4   6   5  102.11   24.96
  -4   6   4  238.82   42.74
  -4   6   4  271.71   35.48
  -4   6   3  249.79   44.01
  -4   6   3  263.38   33.30
  -4   6   2  195.90   39.12
  -4   6   2  255.04   33.51
  -4   6   1  396.23   53.88
  -4   6   1  384.10   40.74
  -4   6   0  129.28   22.97
  -4   6   0   69.01   21.81
  -4   6  -1  386.72   57.70
   4   6   1  636.68   62.88
  -4   6  -2  204.59   39.54
   4   6   2  405.38   49.66
  -4   6  -3  315.54   51.13
   4   6   3  359.48   45.19
  -4   6  -4  323.97   50.30
   4   6   4  377.87   49.46
  -4   6  -5   74.32   23.52
   4   6   5  153.93   34.91
  -4   6  -6   70.79   26.51
   4   6   6   36.35   14.70
  -4   6  -7   32.39   15.85
   4   6   7   53.65   17.52
  -4   6  -8   44.19   20.23
   4   6   8   41.30   17.45
   4   6   8   46.50   23.35
  -4   6  -9   24.28    9.86
   4   6   9   35.67   21.93
  -4   6 -10   21.04   12.26
   4   6  10   14.12   12.25
   4   6  11   37.69   26.88
   4   6  12   33.30   24.08
   4   6  13    0.57    2.86
   4  -7  13    5.82    4.24
   4  -7  12  -16.60   17.53
   4  -7  11   -0.15    9.48
  -4   7  11   24.15   17.89
  -4   7  10   14.97   13.08
  -4   7  10   -6.14    4.69
   4  -7  10  -23.22   16.51
  -4   7   9   51.97   23.68
   4  -7   9   65.27   29.85
  -4   7   9   54.16   20.04
  -4   7   8   26.32   14.90
   4  -7   8   35.71   18.68
  -4   7   8   24.68    7.24
  -4   7   7  120.46   30.19
  -4   7   7  123.59   26.52
  -4   7   6  147.20   26.89
  -4   7   6   95.57   28.08
  -4   7   5  194.19   40.20
  -4   7   5  260.91   37.70
  -4   7   4  193.74   39.84
  -4   7   4  214.15   31.71
  -4   7   3   85.64   25.25
  -4   7   3  110.06   23.00
  -4   7   2   69.57   19.49
  -4   7   2   55.07   22.24
  -4   7   1   90.53   29.37
  -4   7   1  102.98   22.89
   4   7   0  182.75   38.05
  -4   7   0  113.36   25.11
  -4   7   0   94.11   28.50
  -4   7  -1  100.36   30.94
   4   7   1  175.95   35.57
  -4   7  -2   45.31   17.30
   4   7   2   62.40   21.19
  -4   7  -3   97.45   32.79
   4   7   3  157.57   32.20
   4   7   4  233.78   39.64
  -4   7  -4  205.70   42.60
  -4   7  -5  226.76   45.28
   4   7   5  276.78   47.41
   4   7   6  166.25   36.13
  -4   7  -6  122.92   33.50
  -4   7  -7  111.36   31.38
   4   7   7  148.98   32.96
   4   7   8   29.07   15.43
  -4   7  -8   32.59   20.51
   4   7   8   42.77   24.29
  -4   7  -9   58.49   20.49
   4   7   9   46.36   22.92
   4   7   9   31.94   17.86
   4   7  10    3.67   10.54
  -4   7 -10   18.75    8.25
   4   7  10    8.67   11.70
   4   7  11    5.81    7.95
   4   7  11    0.01   14.40
   4   7  12    0.01   11.58
   4   7  13   26.80   25.26
  -4   8  12    0.28    3.77
   4  -8  12    1.56    8.01
   4  -8  11    9.29   12.16
  -4   8  11   11.42    9.96
  -4   8  10   -1.14    3.41
  -4   8  10  -16.97   13.71
   4  -8  10   -7.31   13.60
  -4   8   9   79.61   26.03
   4  -8   9  134.59   39.16
  -4   8   9   86.96   24.67
  -4   8   8  154.85   37.40
  -4   8   8  200.83   37.33
   4  -8   8  227.94   53.60
  -4   8   7    6.01    6.85
  -4   8   7   27.79   12.81
   4  -8   7   42.22   20.38
  -4   8   6   61.53   25.67
  -4   8   6   90.53   24.47
  -4   8   5  151.54   37.69
  -4   8   5  172.87   30.93
  -4   8   4   22.08    7.73
  -4   8   4    9.44    5.13
  -4   8   3    7.85    7.15
  -4   8   3    7.33   12.65
  -4   8   2   92.03   19.86
  -4   8   1  228.91   33.90
   4   8   0   11.77   10.93
  -4   8   0   -4.64    9.91
   4   8   1  297.53   48.60
   4   8   2  100.56   27.79
  -4   8  -3   -8.37   10.93
   4   8   3   12.63   13.84
   4   8   4   21.17   11.39
  -4   8  -4   34.90   18.39
  -4   8  -5  150.77   35.65
   4   8   5  200.44   40.07
  -4   8  -6   77.65   26.65
   4   8   6   91.13   29.65
   4   8   7   28.77   17.90
  -4   8  -7   37.52   17.93
   4   8   7    1.71    8.38
  -4   8  -8  211.81   43.57
   4   8   8  204.60   44.11
   4   8   8  214.69   50.76
  -4   8  -9  126.07   35.62
   4   8   9  124.46   38.18
   4   8   9  139.97   37.65
  -4   8 -10   -3.23    9.49
   4   8  10   -7.75   12.69
   4   8  10   -5.29    7.99
   4   8  11    0.98   13.06
   4   8  11    0.01    5.75
   4   8  12   16.62   25.28
   4   8  12    8.16   14.54
   4  -9  11   -6.22    7.18
  -4   9  11    6.96    9.46
  -4   9  10   11.80   15.03
   4  -9  10   -4.97   13.34
  -4   9  10    6.99    5.32
  -4   9   9   -9.40   11.44
  -4   9   9   -9.44   10.63
  -4   9   8   31.51   19.88
   4  -9   8   38.57   18.21
  -4   9   8   17.06    9.15
  -4   9   7   12.54   12.74
   4  -9   7   27.00   21.31
  -4   9   7    6.09   10.09
  -4   9   6   60.56   18.39
  -4   9   6   79.10   23.90
  -4   9   5  117.97   26.07
  -4   9   5   71.45   27.27
  -4   9   4  119.08   26.00
  -4   9   3   89.23   22.25
  -4   9   2   35.35   13.72
  -4   9   1  114.01   26.70
   4   9   0   30.32   13.82
  -4   9   0    6.63    1.65
   4   9   1  124.60   34.20
   4   9   2   33.02   15.38
   4   9   3   98.53   28.52
   4   9   4  137.64   34.03
   4   9   5  138.21   34.84
  -4   9  -5  104.27   34.76
  -4   9  -6   74.45   26.38
   4   9   6   46.60   19.21
  -4   9  -7   17.32   15.00
   4   9   7   30.22   18.20
   4   9   7   10.81   13.48
   4   9   8   20.72   14.24
  -4   9  -8   30.25   21.78
   4   9   8   24.35   16.80
  -4   9  -9    5.47    7.78
   4   9   9   13.08   10.44
   4   9   9  -10.03    9.92
  -4   9 -10   11.92   13.77
   4   9  10   12.18   13.32
   4   9  10  -20.64   15.02
   4   9  11    2.76    8.79
   4   9  11   -0.29    1.81
  -4  10  10   13.23   12.03
  -4  10  10  -18.19   13.59
  -4  10   9   15.02    9.91
  -4  10   9   42.84   19.33
  -4  10   8   44.40   21.67
  -4  10   8  100.91   28.83
  -4  10   7  -14.30   16.70
  -4  10   7   15.18    8.01
   4 -10   7   -1.54    5.60
  -4  10   6   99.57   25.78
   4 -10   6  186.47   45.35
  -4  10   5    4.82    5.83
  -4  10   4   68.44   20.03
  -4  10   3   82.60   23.31
  -4  10   2   59.92   20.98
  -4  10   1   16.16   11.80
   4  10   0   -1.18    9.66
  -4  10   0   24.08   12.73
   4  10   1    6.69   12.19
   4  10   2   33.99   17.39
   4  10   3   87.02   31.73
   4  10   4   68.92   24.38
   4  10   5   -8.92    9.39
   4  10   6  126.59   36.66
   4  10   6  149.84   40.42
  -4  10  -7    5.01   11.94
   4  10   7   -4.24    1.64
   4  10   7   19.16   12.26
  -4  10  -8  104.69   33.54
   4  10   8  152.86   41.96
   4  10   8   96.12   39.23
  -4  10  -9   54.58   23.26
   4  10   9   23.71   21.21
   4  10  10    0.01   12.38
  -4  10 -10   -2.42   10.65
  -4  11   9  -73.73   28.62
  -4  11   9   16.71   14.12
  -4  11   8   38.32   24.16
  -4  11   8   32.71   17.26
  -4  11   7   14.45   10.85
  -4  11   6  210.35   40.00
  -4  11   5   33.21   16.46
  -4  11   4   16.21    8.78
  -4  11   3   28.92   15.42
  -4  11   2   71.64   23.13
  -4  11   1   79.35   25.80
   4  11   0   32.82   26.63
  -4  11   0   39.36   22.62
   4  11   1   74.73   29.73
   4  11   2   97.68   35.10
   4  11   3   13.26   17.12
   4  11   4   29.17   20.20
   4  11   5   37.42   16.82
   4  11   6  248.23   55.37
   4  11   7   32.83   19.64
  -4  11  -8   83.41   29.61
   4  11   8   33.80   28.93
  -4  11  -9   38.88   21.09
   4  11   9   11.53   24.04
  -4  12   8   21.00   15.78
  -4  12   8   13.74   15.64
  -4  12   7   17.34   13.37
  -4  12   6  105.37   32.42
  -4  12   5  -24.22   14.85
  -4  12   4   37.53   20.10
  -4  12   3   16.20    7.84
  -4  12   2   30.98   18.52
  -4  12   1    3.81   10.32
   4  12   0  115.82   43.23
  -4  12   0  104.41   31.48
   4  12   1   23.77   24.01
   4  12   2   -6.41   10.25
   4  12   3   40.58   28.51
   4  12   4   14.51   16.14
   4  12   5   32.21   20.21
   4  12   6   96.37   38.36
   4  12   7   46.92   33.18
   4  12   8   17.17   23.08
  -4  13   6   11.87   15.86
  -4  13   5   11.01   12.22
  -4  13   4   23.25   13.89
  -4  13   3   -1.76    4.43
  -4  13   2   10.17   10.82
  -4  13   1    0.56    5.32
   4  13   0   35.20   33.01
  -4  13   0   26.80   16.09
   4  13   1   49.53   39.77
   4  13   2    0.01   19.88
   4  13   3    0.01   12.24
   4  13   4   23.93   28.62
   4  13   5   54.20   36.90
   4  13   6   55.73   37.09
  -4  14   4    0.01    5.24
  -4  14   3   10.37   13.97
  -4  14   2   -0.72    5.62
  -4  14   1   -4.42    7.27
   4  14   1   22.84   20.04
   4  14   2    5.39    9.80
   4  14   3   19.34   30.21
   4  14   4   17.40   16.64
  -5   0   0  -11.85    8.26
  -5   0  -1  190.51   35.36
  -5   0   1  180.85   33.69
  -5   0  -2    6.48    4.31
  -5   0   2    7.37    7.15
  -5   0  -3  293.22   44.20
  -5   0   3  292.00   43.54
  -5   0  -4   32.85   15.78
  -5   0   4   44.01   16.95
  -5   0  -5   62.06   21.69
  -5   0   5   52.89   17.59
  -5   0  -6    0.21    5.37
  -5   0   6    2.63    3.50
  -5   0  -7  -11.03   11.79
  -5   0   7   -4.13    8.54
  -5   0  -8   10.29    8.24
  -5   0   8   19.76   13.55
  -5   0  -9   29.05   13.49
  -5   0   9    6.51    2.92
   5   0  10  -35.53   26.26
   5   0  11  -10.47   21.48
   5   0  12   28.42   20.31
   5   0  13   68.98   36.10
   5  -1  13   96.23   41.82
   5  -1  12   98.18   39.89
   5  -1  11  287.08   71.15
  -5   1  10  120.65   28.95
   5  -1  10  258.17   65.02
  -5   1   9  -20.10   11.56
  -5   1   8   14.60    1.99
  -5   1   7   70.70   22.14
  -5  -1  -7   97.04   25.44
  -5   1   6   -3.42    7.55
  -5  -1  -6   12.02    8.36
  -5   1   5   67.51   18.36
  -5  -1  -5   96.34   25.71
  -5   1   4   67.79   19.02
  -5  -1  -4   72.03   21.65
  -5   1   3  117.57   26.32
  -5  -1  -3  144.70   31.29
  -5   1   2  363.72   49.46
  -5  -1  -2  497.76   59.65
  -5   1   1  172.43   33.25
  -5  -1  -1  187.19   36.51
  -5   1   0   86.03   22.49
  -5  -1   0   78.84   23.49
  -5   1  -1  187.44   35.06
  -5  -1   1  205.42   38.74
  -5   1  -2  396.93   51.68
  -5  -1   2  466.70   58.60
  -5   1  -3  139.07   29.35
  -5  -1   3  140.10   30.03
  -5   1  -4   83.68   21.33
  -5  -1   4   93.51   26.43
  -5   1  -5  110.34   26.39
  -5  -1   5   74.83   22.77
  -5   1  -6    7.42    8.84
  -5  -1   6   -3.28    1.96
  -5   1  -7   83.01   23.45
  -5   1  -8   20.67   11.85
  -5   1  -9    6.75    9.28
  -5   1 -10  147.76   30.12
   5   1  10  201.59   56.62
   5   1  11  299.02   72.31
   5   1  12  103.75   39.31
   5   1  13   92.11   42.64
   5  -2  13   16.89   19.44
   5  -2  12  -17.85   17.45
   5  -2  11  -17.86   14.57
  -5   2  10   13.71    9.28
   5  -2  10   29.73   18.31
  -5   2   9   98.59   24.45
  -5   2   8   21.07    9.17
  -5   2   7   -3.47    4.91
  -5   2   6  257.62   40.85
  -5   2   5  237.74   40.29
  -5   2   4   41.49   17.25
  -5   2   3  129.73   29.25
  -5  -2  -3  148.10   32.23
  -5   2   2  332.27   48.65
  -5  -2  -2  354.20   50.96
  -5   2   1   26.98   15.42
  -5  -2  -1   21.55   11.80
  -5   2   0  -14.09   13.20
  -5  -2   0    0.19    5.82
  -5   2  -1   31.97   14.32
  -5  -2   1   13.95   11.70
  -5   2  -2  350.86   51.25
  -5  -2   2  316.41   47.51
  -5   2  -3  116.15   28.28
  -5  -2   3  130.88   30.66
  -5   2  -4   37.37   14.47
  -5   2  -5  247.26   42.24
  -5   2  -6  306.94   46.71
  -5   2  -7    7.76    7.49
  -5   2  -8   21.26   12.55
  -5   2  -9  143.52   30.16
  -5   2 -10   22.93   12.75
   5   2  10   38.07   28.88
   5   2  11   24.11   23.91
   5   2  12  -13.70   15.23
   5   2  13  -20.97   18.97
   5  -3  12   41.14   28.40
   5  -3  11   55.73   32.76
  -5   3  10   43.88   15.98
   5  -3  10   79.70   34.82
  -5   3   9   21.72   12.48
  -5   3   8   30.46   15.61
  -5   3   7   61.32   19.77
  -5   3   6    3.64    4.40
  -5   3   5  212.03   38.41
  -5   3   4   20.95   13.41
  -5   3   3  222.87   39.72
  -5   3   2   67.95   21.78
  -5   3   1   -1.40    8.41
  -5   3   0    2.64    5.72
  -5   3  -1   -2.22    4.65
  -5   3  -2   93.38   29.12
  -5   3  -3  235.48   42.17
  -5   3  -4   23.72   13.25
  -5   3  -5  250.30   43.64
  -5   3  -6   13.97    9.89
  -5   3  -7   59.21   21.73
  -5   3  -8   11.59    1.53
  -5   3  -9   18.25   10.39
  -5   3 -10   62.64   20.29
   5   3  10   76.44   36.03
   5   3  11   44.09   29.76
   5   3  12  -17.57   17.24
   5  -4  12   28.03   21.83
   5  -4  11  -17.56   15.93
  -5   4  10   18.57   10.93
   5  -4  10   15.28   11.02
  -5   4   9   14.53    4.04
  -5   4   8   92.06   24.64
  -5   4   7    4.88    4.79
  -5   4   6  199.39   37.84
  -5   4   5   99.88   27.42
  -5   4   4    2.87    3.92
  -5   4   3  584.38   71.14
  -5   4   2  256.33   45.44
  -5   4   1   58.78   22.77
  -5   4   0    2.31    3.43
  -5   4  -1   65.09   22.71
  -5   4  -2  261.06   46.57
  -5   4  -3  646.54   75.29
  -5   4  -4   21.67   13.61
  -5   4  -5  118.19   28.42
  -5   4  -6  224.07   41.95
  -5   4  -7   25.33   16.08
  -5   4  -8   96.50   26.64
  -5   4  -9   18.79   10.03
  -5   4 -10   22.43   11.48
   5   4  10   36.37   25.85
   5   4  11   31.63   26.62
   5   4  12   18.63   17.62
   5  -5  12   13.17   19.90
   5  -5  11   44.26   29.03
  -5   5  10    3.81    6.40
   5  -5  10   -8.12   11.65
  -5   5   9  -20.70   12.25
   5  -5   9  -21.78   19.35
  -5   5   8   21.68   12.76
  -5   5   7   95.14   25.09
  -5   5   6  113.47   28.72
  -5   5   5   14.08   11.95
  -5   5   4  176.25   37.61
  -5   5   3  156.57   35.04
  -5   5   2   52.27   18.06
  -5   5   1   70.21   23.86
  -5   5   0   38.46   18.28
  -5   5  -1   67.54   24.05
  -5   5  -2   38.99   17.72
  -5   5  -3  173.39   36.42
  -5   5  -4  168.63   35.45
  -5   5  -5   21.77   16.38
  -5   5  -6  119.79   34.66
  -5   5  -7  100.73   29.96
  -5   5  -8   19.26    9.52
  -5   5  -9   -7.22    5.39
  -5   5 -10    1.47    2.78
   5   5  10  -16.70   16.71
   5   5  11    8.27   11.66
   5   5  12   25.14   28.41
   5  -6  11   10.05   15.34
  -5   6  10   18.90   16.19
   5  -6  10    2.52    6.43
  -5   6   9    3.24    4.57
   5  -6   9   24.99   19.19
  -5   6   8    5.96   11.69
  -5   6   7   73.12   22.08
  -5   6   6  203.43   39.67
  -5   6   5   16.12   11.27
  -5   6   4   46.62   18.05
  -5   6   3   60.69   22.37
  -5   6   2   78.09   24.65
  -5   6   1   21.61    9.37
  -5   6   0    4.56    4.35
  -5   6  -1   46.48   22.45
  -5   6  -2   74.26   23.37
  -5   6  -3   61.31   23.26
  -5   6  -4   46.40   19.20
  -5   6  -5   19.72   15.19
  -5   6  -6  251.66   47.48
  -5   6  -7   63.37   24.76
  -5   6  -8   10.61   14.20
  -5   6  -9   14.59   11.42
   5   6   9   10.63   15.99
  -5   6 -10   28.89   13.88
   5   6  10   13.06   19.57
   5   6  11   10.35   12.94
   5  -7  11   27.67   22.73
  -5   7  10   36.49   23.20
   5  -7  10   31.84   21.85
  -5   7   9   -5.02   10.60
   5  -7   9   21.86   22.06
  -5   7   8   -3.35    5.49
  -5   7   7   -5.37    7.28
  -5   7   6   45.84   20.55
  -5   7   5   47.11   18.96
  -5   7   4   35.11   16.19
  -5   7   3   24.06   15.60
  -5   7   2   40.22   18.46
  -5   7   1   37.51   18.09
  -5   7   0   23.84   14.53
  -5   7  -1   28.52   20.54
  -5   7  -2   51.94   21.83
  -5   7  -3   57.74   22.12
  -5   7  -4   30.04   17.81
  -5   7  -5   70.96   24.67
  -5   7  -6   70.59   27.02
  -5   7  -7    6.19    8.74
  -5   7  -8   -3.40    9.24
  -5   7  -9    8.50    8.22
   5   7   9    9.21   17.99
  -5   7 -10   49.62   19.18
   5   7  10   33.69   32.33
   5   7  11   10.21   16.96
  -5   8  10   19.29   16.17
   5  -8  10    1.54   12.22
  -5   8   9  -24.80   16.28
   5  -8   9    8.38    5.24
  -5   8   8   23.79   13.85
   5  -8   8   45.68   24.57
  -5   8   7    0.23    6.88
  -5   8   6   48.18   23.75
  -5   8   5   15.58   13.07
  -5   8   4    2.25    8.38
  -5   8   3  -13.90    9.33
  -5   8   2   73.84   26.02
  -5   8   1  118.56   32.91
  -5   8   0  158.34   40.30
  -5   8  -1  120.78   33.55
  -5   8  -2   74.14   24.47
  -5   8  -3  -13.43    8.51
  -5   8  -4   21.49   16.55
  -5   8  -5   -2.01    7.54
  -5   8  -6   46.06   22.10
  -5   8  -7   -3.65   10.90
  -5   8  -8   29.32   16.50
   5   8   8   56.87   30.23
  -5   8  -9   15.10   13.78
   5   8   9    9.23   19.67
  -5   8 -10   21.23   14.56
   5   8  10   28.76   21.04
  -5   9   9  -45.24   21.21
   5  -9   9   10.83   13.65
  -5   9   8   -6.73   13.76
   5  -9   8  -15.91   16.14
  -5   9   7   33.21   21.81
  -5   9   6  -33.83   18.83
  -5   9   5   33.52   23.49
  -5   9   4    8.83    5.42
  -5   9   3   26.07   13.84
  -5   9   2   23.76    6.21
  -5   9   1   36.96   21.03
  -5   9   0  -18.93   13.08
  -5   9  -1   66.00   25.57
  -5   9  -2   32.81   16.71
  -5   9  -3    9.69   10.08
  -5   9  -4   14.76    9.21
  -5   9  -5   66.15   26.15
  -5   9  -6    9.81    0.74
  -5   9  -7   47.94   24.15
  -5   9  -8    2.92    8.10
   5   9   8  -22.58   18.27
  -5   9  -9   31.54   20.48
   5   9   9   13.46   10.32
  -5  10   8    0.01    6.10
  -5  10   7   23.28   16.15
  -5  10   6  -16.42   13.59
  -5  10   5    5.41   12.59
  -5  10   4   56.46   26.88
  -5  10   3   68.72   29.46
  -5  10   2   59.57   26.68
  -5  10   1   69.99   31.45
  -5  10   0    2.64   12.84
  -5  10  -1   51.09   21.95
  -5  10  -2   38.43   22.98
  -5  10  -3   55.76   27.12
  -5  10  -4   49.90   21.17
  -5  10  -5    8.76    7.41
  -5  10  -6   21.40   15.69
  -5  10  -7   16.31   16.10
  -5  10  -8   35.00   24.28
  -5  11   7  -16.12   13.95
  -5  11   6   26.94   18.13
  -5  11   5  -26.59   18.01
  -5  11   4   -2.45   13.18
  -5  11   3   30.21   21.66
  -5  11   2  -19.46   20.33
  -5  11   1    4.52    3.20
  -5  11   0    8.71   18.88
  -5  11  -1   23.43   17.07
  -5  11  -2   25.46   12.71
  -5  11  -3   54.10   26.64
  -5  11  -4   15.57   18.55
  -5  11  -5   42.54   27.44
  -5  11  -6   70.00   29.72
  -5  11  -7    4.92   15.87
  -5  12   5   30.53   19.96
  -5  12   4    0.01   24.83
  -5  12   3   28.09   21.99
  -5  12   2   14.46   18.30
  -5  12   1   -2.69    7.52
  -5  12   0  -14.40   16.08
  -5  12  -1  -22.61   19.97
  -5  12  -2   19.28    6.01
  -5  12  -3    9.18   21.84
  -5  12  -4   10.75   16.28
  -5  12  -5    6.08    9.01
  -6   0   0  357.77   52.36
  -6   0  -1   31.74   14.54
  -6   0   1   60.42   20.48
  -6   0  -2   14.50    6.69
  -6   0   2   16.00   14.81
  -6   0  -3   28.79   13.97
  -6   0   3   20.35    4.35
  -6   0  -4   88.70   25.07
  -6   0   4   95.47   28.33
  -6   0  -5    9.89    9.12
  -6   0   5   -0.57    3.77
  -6   0  -6  134.26   34.23
  -6   0   6  119.75   29.12
  -6   0  -7   49.81   18.72
  -6   0   7   62.66   19.77
  -6   0  -8   16.11   13.06
  -6   0   8   16.92   13.52
   6   0  11    5.29   16.68
   6  -1  11   15.93   20.95
  -6   1  10   15.78   11.96
  -6   1   9   12.14    5.97
  -6   1   8    5.97   11.45
  -6   1   7  -10.65   14.36
  -6   1   6   22.39   15.22
  -6  -1  -6    6.58    5.62
  -6   1   5   46.73   17.45
  -6  -1  -5   65.11   21.14
  -6   1   4   22.84   11.11
  -6  -1  -4   37.85   16.89
  -6   1   3  155.38   32.71
  -6  -1  -3  189.52   38.66
  -6   1   2  138.97   29.76
  -6  -1  -2  167.31   36.03
  -6   1   1  274.51   43.47
  -6  -1  -1  290.80   48.02
  -6   1   0  330.10   48.62
  -6  -1   0  370.78   54.88
  -6   1  -1  249.01   41.21
  -6  -1   1  274.97   47.06
  -6   1  -2  135.99   29.92
  -6  -1   2  179.09   37.03
  -6   1  -3  179.47   35.36
  -6  -1   3  175.62   35.97
  -6   1  -4   15.63    7.24
  -6  -1   4   16.45   13.04
  -6   1  -5   61.84   20.62
  -6  -1   5   61.89   21.56
  -6   1  -6   15.94   11.35
  -6   1  -7   -7.38    7.78
  -6   1  -8   14.56   11.11
  -6   1  -9   20.45   13.98
  -6   1 -10    4.25    4.59
   6   1  11   31.56   30.36
  -6   2  10    1.33    5.04
  -6   2   9   12.88    8.89
  -6   2   8   13.47   10.20
  -6   2   7    4.45    2.34
  -6   2   6   32.89   17.51
  -6   2   5   11.97    6.50
  -6   2   4   33.50   15.90
  -6   2   3   23.48   11.75
  -6   2   2   11.24   11.78
  -6   2   1   58.91   20.12
  -6   2   0    7.43    9.46
  -6   2  -1   48.89   18.45
  -6   2  -2   14.72   11.94
  -6   2  -3   23.59   12.24
  -6   2  -4   52.99   20.02
  -6   2  -5   33.05   14.23
  -6   2  -6   21.54   12.05
  -6   2  -7   -0.82    3.36
  -6   2  -8   21.66   10.77
  -6   2  -9   17.39   10.68
  -6   2 -10   24.14   14.11
  -6   3  10    6.98   10.46
  -6   3   9    0.00    3.03
  -6   3   8    7.03    6.29
  -6   3   7    8.89    8.90
  -6   3   6   17.40   15.98
  -6   3   5   40.58   13.39
  -6   3   4   99.27   27.92
  -6   3   3   95.88   26.48
  -6   3   2   11.47   12.04
  -6   3   1  134.49   31.70
  -6   3   0  136.53   32.89
  -6   3  -1  170.69   38.50
  -6   3  -2   16.21   10.23
  -6   3  -3   57.09   21.10
  -6   3  -4   85.73   25.18
  -6   3  -5   44.83   17.81
  -6   3  -6   -4.06    5.92
  -6   3  -7    3.31    7.01
  -6   3  -8   17.68   12.14
  -6   3  -9    9.15    9.08
  -6   3 -10    2.65    6.85
  -6   4  10   -0.55    1.99
   6  -4  10   23.48   30.85
  -6   4   9  -30.65   15.76
  -6   4   8    8.50    8.11
  -6   4   7   17.57   14.64
  -6   4   6   52.85   20.74
  -6   4   5   10.13    9.37
  -6   4   4    4.48    3.16
  -6   4   3   30.12   14.52
  -6   4   2   18.81   11.49
  -6   4   1   48.51   16.29
  -6   4   0   29.96   15.34
  -6   4  -1   86.05   26.46
  -6   4  -2   36.99   15.35
  -6   4  -3   32.53   15.46
  -6   4  -4    5.00    8.64
  -6   4  -5   11.39   11.81
  -6   4  -6   67.09   22.31
  -6   4  -7   38.28   19.32
  -6   4  -8   28.29   11.72
  -6   4  -9    1.27    7.71
  -6   4 -10   10.26   11.79
   6   4  10    0.01   13.78
  -6   5   9  -57.19   22.95
  -6   5   8   -5.95    7.18
  -6   5   7   11.23    9.97
  -6   5   6   27.61   15.25
  -6   5   5  -13.03   14.20
  -6   5   4   33.69   14.06
  -6   5   3    0.34    5.38
  -6   5   2   20.96   17.13
  -6   5   1   16.85   11.62
  -6   5   0  240.13   43.99
  -6   5  -1   -6.80   10.70
  -6   5  -2   -5.32    6.93
  -6   5  -3   45.20   20.29
  -6   5  -4   36.77   18.76
  -6   5  -5   -3.25    2.50
  -6   5  -6   69.61   24.67
  -6   5  -7   35.05   18.91
  -6   5  -8    9.62    9.06
  -6   5  -9   20.17   12.05
  -6   6   9   47.86   25.41
  -6   6   8   17.46   17.27
  -6   6   7  -10.71    9.91
  -6   6   6   22.21   13.94
  -6   6   5   42.85   20.53
  -6   6   4  125.26   34.58
  -6   6   3  127.55   32.17
  -6   6   2   25.96   16.00
  -6   6   1   27.05    7.88
  -6   6   0   68.84   24.26
  -6   6  -1   18.50   10.50
  -6   6  -2   53.92   22.79
  -6   6  -3  101.39   31.21
  -6   6  -4  100.82   30.88
  -6   6  -5   66.77   27.01
  -6   6  -6   40.57   21.83
  -6   6  -7   15.95   15.93
  -6   6  -8   36.08   19.12
  -6   6  -9    7.68    8.05
  -6   7   8   -7.96    8.79
  -6   7   7   -0.01    4.62
  -6   7   6   -2.10    4.70
  -6   7   5   15.24   14.20
  -6   7   4    6.46   14.35
  -6   7   3   15.10    9.96
  -6   7   2   -3.41    7.58
  -6   7   1   21.27   13.96
  -6   7   0   53.76   20.25
  -6   7  -1   16.92   12.69
  -6   7  -2   35.77   20.22
  -6   7  -3   14.19    7.52
  -6   7  -4  -12.00   11.16
  -6   7  -5   -2.12    1.77
  -6   7  -6   -9.79   13.48
  -6   7  -7   10.79   12.33
  -6   7  -8   19.39   14.66
  -6   8   7    0.01    7.97
  -6   8   6   -4.56    6.84
  -6   8   5    7.72    8.01
  -6   8   4   10.10   13.97
  -6   8   3   19.22   14.97
  -6   8   2    4.75    4.08
  -6   8   1   75.03   27.33
  -6   8   0   82.80   30.45
  -6   8  -1   85.70   30.00
  -6   8  -2   17.57   13.85
  -6   8  -3   12.65   10.21
  -6   8  -4    0.97    5.35
  -6   8  -5   25.14   14.02
  -6   8  -6   15.84   10.64
  -6   8  -7    2.91    5.60
  -6   9   6   10.52   10.72
  -6   9   5    2.81    2.42
  -6   9   4    9.56   15.27
  -6   9   3    2.33    6.67
  -6   9   2   42.47   17.73
  -6   9   1   41.11   22.37
  -6   9   0   56.55   28.49
  -6   9  -1   -1.62    4.90
  -6   9  -2   39.63   23.33
  -6   9  -3   -4.30    7.90
  -6   9  -4   23.94   19.27
  -6   9  -5   71.31   30.96
  -6   9  -6   12.19    5.69
  -6  10   4   28.56   18.75
  -6  10   3    0.01   19.00
  -6  10   2  -44.84   23.35
  -6  10   1    4.40    6.69
  -6  10   0  -12.15   14.15
  -6  10  -1   15.05   22.04
  -6  10  -2  -43.04   22.95
  -6  10  -3   58.88   31.94
  -6  10  -4  -57.07   26.73
  -7   0   0    2.69    6.69
  -7   0  -1  111.01   29.58
  -7   0   1   97.62   28.99
  -7   0  -2   15.04   15.56
  -7   0   2    0.82   11.21
  -7   0  -3   22.36   14.48
  -7   0   3   13.28    5.37
  -7   0  -4   28.39   14.55
  -7   0   4   -3.73    6.35
  -7   0  -5   35.22   18.67
  -7   0   5   21.85   15.71
  -7   0  -6    5.83    9.91
  -7   0   6   -2.54    4.73
  -7   0  -7   44.47   19.49
  -7   1   7   16.62   12.17
  -7   1   6   13.53   12.04
  -7   1   5    7.51   10.69
  -7   1   4    5.07   10.78
  -7   1   3   66.66   23.79
  -7  -1  -3   63.11   22.36
  -7   1   2  -16.73   13.09
  -7  -1  -2   -3.66   10.25
  -7   1   1   37.92   15.53
  -7  -1  -1   46.28   19.81
  -7   1   0   15.95    8.82
  -7  -1   0    9.72    4.92
  -7   1  -1   43.08   20.20
  -7  -1   1   62.83   24.16
  -7   1  -2   -4.37    9.66
  -7  -1   2    2.52    5.70
  -7   1  -3   53.61   21.70
  -7  -1   3   68.38   25.04
  -7   1  -4    9.43    8.17
  -7   1  -5   24.89   14.34
  -7   1  -6   57.25   23.78
  -7   1  -7   -6.71   10.31
  -7   2   7    5.51   11.91
  -7   2   6   18.57   12.77
  -7   2   5   10.11    8.07
  -7   2   4   -6.29    6.75
  -7   2   3   -4.74    6.44
  -7   2   2   29.57   15.21
  -7   2   1   37.47   17.39
  -7   2   0   -2.61    6.63
  -7   2  -1   58.72   20.38
  -7   2  -2   17.58    7.72
  -7   2  -3   10.95    5.28
  -7   2  -4   15.27   13.18
  -7   2  -5   43.65   20.25
  -7   2  -6   40.15   19.26
  -7   2  -7   -3.03    5.27
  -7   3   6    2.86    4.87
  -7   3   5    4.02    8.25
  -7   3   4   -6.09   10.85
  -7   3   3   11.00    9.83
  -7   3   2   38.77   18.82
  -7   3   1   33.24   12.91
  -7   3   0  126.57   30.76
  -7   3  -1   42.38   18.51
  -7   3  -2   40.20   18.25
  -7   3  -3   13.97   11.21
  -7   3  -4    7.69    9.20
  -7   3  -5   33.98   18.37
  -7   3  -6   22.11   13.61
  -7   4   6   13.19    9.62
  -7   4   5  -17.62   12.30
  -7   4   4   28.13   19.35
  -7   4   3   19.03   16.16
  -7   4   2    2.81    2.54
  -7   4   1   66.03   24.49
  -7   4   0   11.42   10.25
  -7   4  -1   61.53   23.35
  -7   4  -2   18.72    9.57
  -7   4  -3   20.94   16.11
  -7   4  -4   14.29   13.29
  -7   4  -5   -8.47    8.69
  -7   4  -6    7.39    9.20
  -7   5   5   -0.02    7.65
  -7   5   4    7.59   12.01
  -7   5   3  119.18   35.34
  -7   5   2    7.02    7.71
  -7   5   1   -0.89    9.70
  -7   5   0   19.74   11.83
  -7   5  -1   28.56   17.06
  -7   5  -2    7.79    6.19
  -7   5  -3  147.42   39.05
  -7   5  -4  -16.27   12.68
  -7   5  -5   -4.48    6.57
  -7   6   4   16.31   14.70
  -7   6   3    0.43    4.11
  -7   6   2  -33.52   18.50
  -7   6   1   48.58   23.52
  -7   6   0   17.01   15.93
  -7   6  -1   42.68   18.39
  -7   6  -2    7.18   12.87
  -7   6  -3    1.34    5.69
  -7   6  -4   34.32   18.80
  -7   7   2   -2.21    4.90
  -7   7   1   24.01   19.54
  -7   7   0   14.83   12.68
  -7   7  -1   13.28    0.80
  -7   7  -2    5.87    7.99
   0   0   0    0.00    0.00


TITL exp_809 in P2(1)2(1)2(1)
REM P2(1)2(1)2(1) (#19 in standard setting)
CELL 0.71073   6.060781  13.231215  13.608243  90.0000  90.0000  90.0000
ZERR    5.00   0.000910   0.002245   0.002049   0.0000   0.0000   0.0000
LATT -1
SYMM -x+1/2,-y, z+1/2
SYMM -x, y+1/2,-z+1/2
SYMM  x+1/2,-y+1/2,-z
SFAC C H N O
UNIT 55.00 50.00 5.00 5.00
TREF
HKLF 4
END
_computing_structure_solution     'SHELXT 2018/2 (Sheldrick, 2018)'
;
_shelx_hkl_checksum                79598
_olex2_submission_special_instructions  'No special instructions were received'
_oxdiff_exptl_absorpt_empirical_details
;
Empirical correction (ABSPACK) includes:
- Absorption correction using spherical harmonics
- Frame scaling
;
_oxdiff_exptl_absorpt_empirical_full_max  1.632
_oxdiff_exptl_absorpt_empirical_full_min  0.604
